# Supplementary material for: Development of GSK's reagent guides – embedding sustainability into reagent selection
Source: Royal Society of Chemistry journal article supplement (doi:10.1039/c3gc40225h), 2013-01-01
Supplement: c3gc40225h.pdf [file c3gc40225h.pdf]

## Supplementary Info:

|                                                                              |    |
|------------------------------------------------------------------------------|----|
| Figure S1: GSK Alkene Reduction Green Reagent Guide.....                     | 2  |
| Figure S2: GSK Amide Formation Green Reagent Guide.....                      | 3  |
| Figure S3: GSK C-H Bromination Green Reagent Guide. ....                     | 4  |
| Figure S4: GSK C-H Chlorination Green Reagent Guide.....                     | 5  |
| Figure S5: GSK Deoxychlorination Green Reagent Guide.....                    | 6  |
| Figure S6: GSK Epoxide Formation From Olefin Green Reagent Guide.....        | 7  |
| Figure S7: GSK Ester Formation Green Reagent Guide. ....                     | 8  |
| Figure S8: GSK Ether Formation Green Reagent Guide.....                      | 9  |
| Figure S9: GSK Fluorination Green Reagent Guide.....                         | 10 |
| Figure S10: GSK Iodination Green Reagent Guide.....                          | 11 |
| Figure S11: GSK Ketone Reduction Green Reagent Guide .....                   | 12 |
| Figure S12: GSK Nitro Reduction Green Reagent Guide .....                    | 13 |
| Figure S13: GSK Oxidation to Aldehydes and Ketones Green Reagent Guide. .... | 14 |
| Figure S14: GSK Reductive Amination Green Reagent Guide .....                | 15 |
| Figure S15: GSK Oxidation to Sulfones Green Reagent Guide .....              | 16 |

a)

| GSK Reagent Selection Guide – Alkene Reduction |                                                        |                                      |
|------------------------------------------------|--------------------------------------------------------|--------------------------------------|
| Few Issues                                     | Some Issues                                            | Major Issues                         |
| H <sub>2</sub> , Pd/C                          | HCO <sub>2</sub> Na, Pd/C                              | Li, 4,4'-Di- <i>t</i> -butylbiphenyl |
| H <sub>2</sub> , Ru/C                          | NaBH <sub>4</sub> , Pd/C                               | Li, NH <sub>3</sub>                  |
| H <sub>2</sub> , Pd(OH) <sub>2</sub> /C        | HCO <sub>2</sub> NH <sub>4</sub> , Pd/C                | H <sub>2</sub> , Raney Ni            |
| H <sub>2</sub> , Pt/C                          | Li, <i>n</i> -Propylamine, Ethylenediamine             | Cyclohexene, Pd/C                    |
| H <sub>2</sub> , Rh/C                          | H <sub>2</sub> , Rh(PPh <sub>3</sub> ) <sub>3</sub> Cl | HI, Red phosphorus                   |
| H <sub>2</sub> , Crabtree's catalyst           | Et <sub>3</sub> SiH, Pd/C                              | Hydrazine, <i>N</i> -Ethylriboflavin |
| H <sub>2</sub> , PtO <sub>2</sub>              | Et <sub>3</sub> SiH, TFA                               |                                      |
|                                                | HCO <sub>2</sub> NEt <sub>3</sub> H, Pd/C              |                                      |
|                                                | Stabilized sodium                                      |                                      |

This guide should only be used by the expert trained chemist. Before using any reagent listed on this guide, a complete risk assessment must be carried out.

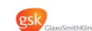

b)

| Material                                                                                   | Full name                                                                                       | CAS / MFCD number               | EHS | Clean chemistry | Greenness | Comment                                                                                            |
|--------------------------------------------------------------------------------------------|-------------------------------------------------------------------------------------------------|---------------------------------|-----|-----------------|-----------|----------------------------------------------------------------------------------------------------|
| H <sub>2</sub> , Pd/C                                                                      | Hydrogen, Palladium on Carbon                                                                   | 1333-74-0/7440-05-3             | 7   | 7               | 7.2       | Flammable. Relative cost cheap. Catalyst can be recycled.                                          |
| H <sub>2</sub> , Ru/C                                                                      | Hydrogen, Ruthenium on Carbon                                                                   | 1333-74-0/7440-18-8             | 7   | 7               | 7.2       | Flammable. Relative cost cheap. Catalyst can be recycled.                                          |
| H <sub>2</sub> , Pd(OH) <sub>2</sub> /C                                                    | Hydrogen, Palladium hydroxide                                                                   | 1333-74-0<br>12135-22-7         | 7   | 7               | 7.2       | Flammable. Slightly more expensive than Pd/C. Catalyst can be recycled.                            |
| H <sub>2</sub> , Pt/C                                                                      | Hydrogen, Platinum on Carbon                                                                    | 1333-74-0<br>7440-06-4          | 7   | 7               | 7.2       | Flammable. Relative cost expensive. Catalyst can be recycled.                                      |
| H <sub>2</sub> , Rh/C                                                                      | Hydrogen, Rhodium on Carbon                                                                     | 1333-74-0/7440-16-6             | 7   | 7               | 7.1       | Flammable. Relative cost extremely expensive.                                                      |
| H <sub>2</sub> , Crabtree's catalyst                                                       | Hydrogen, (1,5-Cyclooctadiene)(pyridine)(tricyclohexylphosphine)-iridium(I) hexafluorophosphate | 1333-74-0<br>64536-78-3         | 7   | 6               | 6.8       | Flammable. Relative cost of iridium very expensive. Catalyst can be recycled.                      |
| H <sub>2</sub> , PtO <sub>2</sub>                                                          | Hydrogen, Platinum oxide                                                                        | 1333-74-0<br>1314-15-4          | 5   | 7               | 6.1       | Flammable. Relative cost expensive. Catalyst can be recycled.                                      |
| HCO <sub>2</sub> Na, Pd/C                                                                  | Sodium Formate, Palladium on Carbon                                                             | 141-53-7<br>7440-05-3           | 7   | 5               | 5.9       | Hydrogen transfer. Reaction rates, off-gassing rates may be a concern on some systems.             |
| Ammonium formate, Pd/C                                                                     | Ammonium Formate, Palladium on Carbon                                                           | 540-69-2<br>7440-05-3           | 7   | 5               | 5.8       | Hydrogen transfer. Reaction rates, off-gassing rates may be a concern on some systems.             |
| H <sub>2</sub> , Rh(PPh <sub>3</sub> ) <sub>3</sub> Cl                                     | Hydrogen, Chlorotris(triphenylphosphine)rhodium(I)                                              | 1333-74-0/14694-95-2            | 5   | 6               | 5.8       | Flammable. Relative cost of rhodium extremely expensive.                                           |
| Et <sub>3</sub> SiH, Pd/C                                                                  | Triethylsilane, Palladium on Carbon                                                             | 617-86-7/7440-05-3              | 7   | 5               | 5.5       | Hydrogen transfer.                                                                                 |
| Stabilized sodium                                                                          | Sodium on Silica gel                                                                            | MFCD01941718                    | 5   | 5               | 5.3       | Used in Birch reduction, no need for ammonia.                                                      |
| NaBH <sub>4</sub> , Pd/C                                                                   | Sodium borohydride, Palladium on Carbon, Acetic acid                                            | 16940-66-2<br>7440-05-3/64-19-7 | 5   | 5               | 5.3       | Acetic acid required.                                                                              |
| Li, <i>n</i> -Propylamine, NH <sub>2</sub> CH <sub>2</sub> CH <sub>2</sub> NH <sub>2</sub> | Lithium, <i>n</i> -Propylamine, Ethylenediamine                                                 | 7439-93-2/107-10-8<br>107-15-3  | 5   | 5               | 5.0       | Flammable.                                                                                         |
| Et <sub>3</sub> SiH, TFA                                                                   | Triethylsilane, Trifluoroacetic acid                                                            | 617-86-7<br>76-05-1             | 5   | 5               | 4.9       | Higher stoichiometry of Et <sub>3</sub> SiH may be required for less electron rich alkenes.        |
| HCO <sub>2</sub> NEt <sub>3</sub> H, Pd/C                                                  | Triethylammonium formate, Palladium on Carbon                                                   | 585-29-5<br>7440-05-3           | 5   | 4               | 4.9       | Hydrogen transfer. Reaction rates, off-gassing rates may be a concern on some systems.             |
| Li, 4,4'-Di- <i>t</i> -butylbiphenyl                                                       | Lithium, 4,4'-Di- <i>tert</i> -butylbiphenyl                                                    | 7439-93-2<br>1625-91-8          | 5   | 2               | 3.5       | Causes burns. Reacts violently with water.                                                         |
| Li, NH <sub>3</sub>                                                                        | Lithium, Ammonia                                                                                | 7439-93-2<br>7664-41-7          | 4   | 3               | 3.3       | Causes burns. Very toxic to aquatic organisms. Danger of serious irreversible effects by exposure. |
| H <sub>2</sub> , Raney Ni                                                                  | Hydrogen, Raney nickel                                                                          | 1333-74-0<br>7440-02-0          | 1   | 6               | 3.0       | Highly flammable. Potential carcinogen and sensitizer.                                             |
| Cyclohexene, Pd/C                                                                          | Cyclohexene, Palladium on Carbon                                                                | 110-83-8<br>7440-05-3           | 1   | 6               | 3.0       | Benzene (known carcinogen) forms as by-product.                                                    |
| HI, Red phosphorus                                                                         | Hydroiodic acid, Red phosphorus                                                                 | 10034-85-2<br>7723-14-0         | 2   | 3               | 2.7       | Highly flammable. Red phosphorus is a controlled substance.                                        |
| Hydrazine, <i>N</i> -Ethylriboflavin                                                       | Hydrazine, <i>N</i> -Ethylriboflavin                                                            | 302-01-2<br>N/A                 | 1   | 4               | 2.4       | Hydrazine is a material of concern. May cause cancer.                                              |

Figure S1: GSK Alkene Reduction Green Reagent Guide. a) Front of guide with overview, b) Reverse of guide with more detail.

a)

Few Issues

Some Issues

Major Issues

Enzyme

Ghosez reagent

Activated silica

CDI

COMU®

*i*-BuOCOCI

Thionyl chloride

EDCI (WSCDI)

T3P®

Oxalyl chloride

CDMT

PyBOP®

TBTU

DCC

DPPA

Boric Acid

Cyanuric chloride

HOBt

DMTMM

HBTU

DIC

HATU

HOAt

b)

| Material          | Full Name                                                                                                        | CAS number   | EHS | Clean Chemistry | Greenness | Comments                                                                                                                      |
|-------------------|------------------------------------------------------------------------------------------------------------------|--------------|-----|-----------------|-----------|-------------------------------------------------------------------------------------------------------------------------------|
| Enzyme            | Enzyme                                                                                                           | N/A          | 10  | 8               | 8.8       |                                                                                                                               |
| Activated silica  | Thermally activated Kiesegel 60                                                                                  | 7631-86-9    | 10  | 8               | 8.7       | Activated at > 600 °C.                                                                                                        |
| CDI               | 1,1-Carbonyl diimidazole                                                                                         | 530-62-1     | 7   | 7               | 6.5       | Gaseous and water soluble byproducts.                                                                                         |
| COMU®             | (1-Cyano-2-ethoxy-2-oxoethylidenaminoxy)dimethylamino morpholino-carbenium hexafluorophosphate                   | 1075198-30-9 | 10  | 4               | 6.5       | Water soluble byproduct.                                                                                                      |
| <i>i</i> -BuOCOCI | Isobutyl chloroformate                                                                                           | 543-27-1     | 7   | 6               | 6.4       | Lachrymator, gaseous byproducts. Recommended storage at +4 °C. Activated species forms quickly.                               |
| Ghosez reagent    | 1-Chloro- <i>N,N</i> ,2-trimethyl-1-propenylamine                                                                | 26189-59-3   | 7   | 6               | 6.4       | Recommended storage at +4 °C.                                                                                                 |
| Mukaiyama reagent | 2-Chloro-1-methylpyridinium iodide                                                                               | 14338-32-0   | 10  | 4               | 6.3       | Recommended storage at +4 °C.                                                                                                 |
| SuOCOOSu          | <i>N,N'</i> -Disuccinimidyl carbonate                                                                            | 74124-79-1   | 9   | 4               | 6.3       | Water sensitive. Recommended storage at +4 °C.                                                                                |
| TFFH              | Fluoro- <i>N,N,N',N'</i> -tetramethylformamidinium hexafluorophosphate                                           | 164298-23-1  | 10  | 4               | 6.0       | Fluoride byproduct may limit vessel choice. Avoid acidic work-up.                                                             |
| EEDQ              | 2-Ethoxy-1-ethoxycarbonyl-1,2-dihydroquinoline                                                                   | 16357-59-8   | 9   | 4               | 5.6       | Odour. Recommended storage at +4 °C                                                                                           |
| Thionyl chloride  | Thionyl chloride                                                                                                 | 7719-09-7    | 5   | 6               | 5.5       | Lachrymator. Gaseous byproducts .                                                                                             |
| EDCI (WSCDI)      | [1-(3-Dimethylaminopropyl)-3-ethylcarbodiimide hydrochloride]                                                    | 25952-53-8   | 7   | 4               | 5.3       | Water soluble byproducts. Recommended storage at +4 °C. Known to test AMES positive, potential mutagen.                       |
| T3P®              | 2-Propanephosphonic acid anhydride                                                                               | 68957-94-8   | 5   | 5               | 5.3       | Regulated chemical. Usage as 50% in EtOAc preferable to DMF solution.                                                         |
| Oxalyl chloride   | Oxalyl chloride                                                                                                  | 79-37-8      | 5   | 5               | 5.2       | Lachrymator. Gaseous byproducts. Scored for usage on own, usage with DMF not recommended as DMCC carcinogen may be produced.  |
| CDMT              | 2-Chloro-4,6-dimethoxy-1,3,5-triazine                                                                            | 3140-73-6    | 5   | 5               | 5.0       | Sensitizer. Toxic to aquatic organisms.                                                                                       |
| PyBOP®            | Benzotriazol-1-yl-oxytripyrrolidinophosphonium hexafluorophosphate                                               | 128625-52-5  | 10  | 3               | 5.2       | Cytotoxic urea byproduct.                                                                                                     |
| TBTU              | <i>O</i> -Benzotriazol-1-yl- <i>N,N,N',N'</i> -tetramethyluronium tetrafluoroborate                              | 125700-67-6  | 3   | 6               | 4.5       | Risk of explosion. Urea byproduct difficult to remove.                                                                        |
| DCC               | <i>N,N'</i> -Dicyclohexylcarbodiimide                                                                            | 538-75-0     | 7   | 3               | 4.4       | Urea byproduct is a sensitizer, also difficult to remove.                                                                     |
| DPPA              | Diphenylphosphoryl azide                                                                                         | 26386-88-9   | 5   | 3               | 4.2       | May form explosive hydrogen azide on contact with moisture.                                                                   |
| Boric acid        | Boric acid                                                                                                       | 10043-35-3   | 2   | 9               | 4.1       | May damage fertility. May damage the unborn child.                                                                            |
| Cyanuric chloride | 2,4,6-Trichloro-1,3,5-triazine                                                                                   | 108-77-0     | 3   | 6               | 3.8       | Reacts violently with water. Causes burns. Toxic by inhalation.                                                               |
| HOBt              | 1-Hydroxybenzotriazole hydrate                                                                                   | 123333-53-9  | 3   | 4               | 3.7       | May cause explosion. Cytotoxic urea byproduct.                                                                                |
| DMTMM             | 4-Dimethoxy-1,3,5-triazin-2-yl)-4-methyl morpholinium chloride                                                   | 3945-69-5    | 3   | 5               | 3.6       | Causes burns.                                                                                                                 |
| HBTU              | <i>N,N,N',N'</i> -Tetramethyl- <i>O</i> -(benzotriazol-1-yl)uronium hexafluorophosphate                          | 94790-37-1   | 3   | 4               | 3.5       | Cytotoxic urea byproduct.                                                                                                     |
| DIC               | Diisopropyl carbodiimide                                                                                         | 693-13-0     | 3   | 4               | 3.5       | Flammable. Toxic by inhalation.                                                                                               |
| HATU              | 1-[Bis(dimethylamino)methylene]-1 <i>H</i> -1,2,3-triazolo[4,5- <i>b</i> ]pyridinium 3-oxide hexafluorophosphate | 148893-10-1  | 3   | 4               | 3.3       | Cytotoxic urea byproduct.                                                                                                     |
| HOAt              | 1-Hydroxy-7-azabenzotriazole                                                                                     | 39968-33-7   | 2   | 5               | 2.9       | May cause explosion. Cytotoxic urea byproduct. Currently only available as DMF solution - may cause harm to the unborn child. |

Figure S2: GSK Amide Formation Green Reagent Guide. a) Front of guide with overview, b) Reverse of guide with more detail.

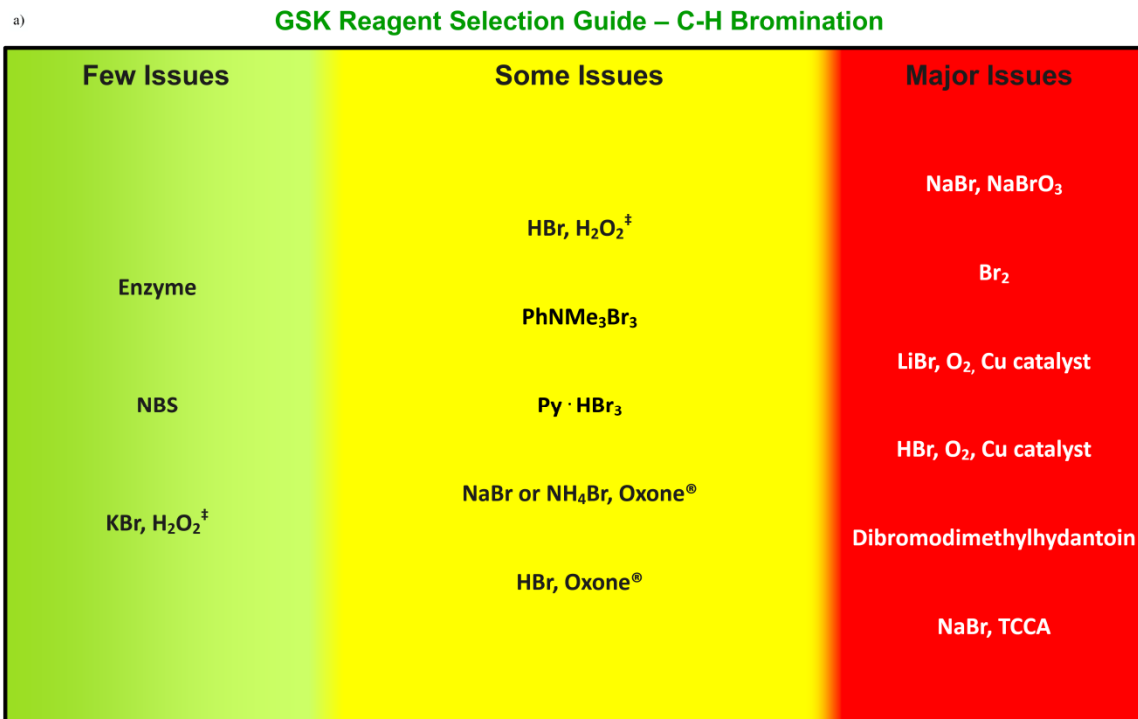

<sup>‡</sup> Use of ≤30% H<sub>2</sub>O<sub>2</sub> is required for these procedures to not fall into the "Major Issues" category.

This guide should only be used by the expert trained chemist. Before using any reagent listed on this guide, a complete risk assessment must be carried out.

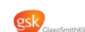

b)

| Material                           | Full name                                                    | CAS number                            | EHS | Clean chemistry | Greenness | Comments                                                                                                                          |
|------------------------------------|--------------------------------------------------------------|---------------------------------------|-----|-----------------|-----------|-----------------------------------------------------------------------------------------------------------------------------------|
| Enzyme                             | Enzyme                                                       | N/A                                   | 10  | 9               | 9.3       |                                                                                                                                   |
| NBS                                | N-Bromosuccinimide                                           | 128-08-5                              | 7   | 7               | 7.3       |                                                                                                                                   |
| KBr, H <sub>2</sub> O <sub>2</sub> | Potassium bromide, Hydrogen peroxide (≤30%)                  | 7758-02-3<br>7722-84-1                | 7   | 7               | 7.3       |                                                                                                                                   |
| HBr, H <sub>2</sub> O <sub>2</sub> | Hydrogen bromide, Hydrogen peroxide (≤30%)                   | 10035-10-6<br>7722-84-1               | 7   | 6               | 6.7       | Causes burns.                                                                                                                     |
| PhNMe <sub>3</sub> Br <sub>3</sub> | Phenyltrimethylammonium tribromide                           | 4207-56-1                             | 7   | 5               | 6.3       | Causes burns.                                                                                                                     |
| PyHBr <sub>3</sub>                 | Pyridinium hydrobromide perbromide                           | 39416-48-3                            | 7   | 5               | 6.1       | Causes burns.                                                                                                                     |
| NaBr or NH <sub>4</sub> Br, Oxone® | Sodium bromide or Ammonium bromide, Potassium monopersulfate | 7647-15-6 or 70693-62-8<br>37222-66-5 | 5   | 4               | 4.9       | Causes burns. Oxone is highly exothermic and less stable above pH 7. May be unstable in the presence of water above 70 °C.        |
| HBr, Oxone®                        | Hydrogen bromide, Potassium monopersulfate                   | 10035-10-6<br>37222-66-5              | 5   | 4               | 4.6       | Causes burns. Oxone is highly exothermic and less stable above pH 7. May be unstable in the presence of water above 70 °C.        |
| NaBr, NaBrO <sub>3</sub>           | Sodium bromide, Sodium bromate                               | 7647-15-6<br>7789-38-0                | 3   | 8               | 4.8       | May cause fire.                                                                                                                   |
| Br <sub>2</sub>                    | Bromine                                                      | 7726-95-6                             | 3   | 8               | 4.5       | Causes severe burns, very toxic by inhalation.                                                                                    |
| LiBr, O <sub>2</sub> , Cu catalyst | Lithium bromide, Oxygen, Copper catalyst                     | 7550-35-8                             | 3   | 6               | 4.3       | Copper catalyst is very toxic to aquatic environment. Solvent selection should take oxygen atmosphere into account.               |
| HBr, O <sub>2</sub> , Cu catalyst  | Hydrogen bromide, Oxygen, Copper catalyst                    | 10035-10-6                            | 2   | 7               | 3.7       | Copper catalyst is very toxic to aquatic environment. Causes burns. Solvent selection should take oxygen atmosphere into account. |
| Dibromodimethylhydantoin           | 1,3-Dibromo-5,5-dimethylhydantoin                            | 77-48-5                               | 2   | 5               | 3.2       | May cause fire.                                                                                                                   |
| NaBr, TCCA                         | Sodium bromide, Trichloroisocyanuric acid                    | 7647-15-6<br>87-90-1                  | 2   | 4               | 3.1       | May cause explosion.                                                                                                              |

Figure S3: GSK C-H Bromination Green Reagent Guide. a) Front of guide with overview, b) Reverse of guide with more detail.

a)

| GSK Reagent Selection Guide – C-H Chlorination  |                                 |                                    |
|-------------------------------------------------|---------------------------------|------------------------------------|
| Few Issues                                      | Some Issues                     | Major Issues                       |
| Enzyme                                          |                                 | LiCl, O <sub>2</sub> , Cu catalyst |
|                                                 | SO <sub>2</sub> Cl <sub>2</sub> | CuCl <sub>2</sub> , Alumina        |
| HCl, Air                                        |                                 | Sodium dichloroisocyanurate        |
|                                                 | Cl <sub>2</sub>                 |                                    |
| NCS                                             | KCl, Oxone®                     |                                    |
|                                                 | NaOCl                           | Hexachloroethane                   |
| HCl, H <sub>2</sub> O <sub>2</sub> <sup>‡</sup> | Dichlorodimethylhydantoin       | TCCA                               |

<sup>‡</sup> Use of ≤30% H<sub>2</sub>O<sub>2</sub> is required for these procedures to not fall into the "Major Issues" category.

This guide should only be used by the expert trained chemist. Before using any reagent listed on this guide, a complete risk assessment must be carried out.

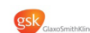

b)

| Material                           | Full name                                    | CAS number              | EHS | Clean chemistry | Greenness | Comments                                                                                                              |
|------------------------------------|----------------------------------------------|-------------------------|-----|-----------------|-----------|-----------------------------------------------------------------------------------------------------------------------|
| Enzyme                             | Enzyme                                       | N/A                     | 10  | 9               | 9.3       |                                                                                                                       |
| HCl, air                           | Hydrochloric acid, Air                       | 7647-01-0               | 7   | 7               | 7.2       | Solvent selection should take oxygen atmosphere into account.                                                         |
| NCS                                | <i>N</i> -Chlorosuccinimide                  | 128-09-6                | 7   | 7               | 7.2       |                                                                                                                       |
| HCl, H <sub>2</sub> O <sub>2</sub> | Hydrochloric acid, Hydrogen peroxide (≤30%)  | 7647-01-0<br>7722-84-1  | 7   | 6               | 6.8       | Possible generation of chlorine and/or oxygen gas.                                                                    |
| SO <sub>2</sub> Cl <sub>2</sub>    | Sulfuryl chloride                            | 7791-25-5               | 5   | 6               | 5.8       | Can generate elemental sulfur and SO <sub>2</sub> , will likely need scrubbing.                                       |
| Cl <sub>2</sub>                    | Chlorine                                     | 7782-50-5               | 5   | 6               | 5.8       | Handling gases, co-catalyst may be required. Acid/base extractions may be an issue on larger scale.                   |
| NaOCl                              | Sodium hypochlorite                          | 7681-52-9               | 4   | 8               | 5.5       |                                                                                                                       |
| HCl, Oxone <sup>®</sup>            | Hydrochloric acid, Potassium monopersulfate  | 7647-01-0<br>37222-66-5 | 5   | 5               | 5.2       | Possible generation of chlorine and/or oxygen. Can be voluminous when large excesses of Oxone <sup>®</sup> required.  |
| KCl, Oxone <sup>®</sup>            | Potassium chloride, Potassium monopersulfate | 7447-40-7<br>37222-66-5 | 5   | 5               | 5.2       | Possible generation of chlorine and/or oxygen. Can be voluminous when large excesses of Oxone <sup>®</sup> required.  |
| Dichlorodimethylhydantoin          | Dichlorodimethylhydantoin                    | 118-52-5                | 4   | 6               | 5.0       | Both halogens present may react, although rates of reaction may vary in each case.                                    |
| LiCl, O <sub>2</sub> , Cu catalyst | Lithium chloride, Oxygen, Copper catalyst    | 7447-41-8               | 3   | 6               | 4.0       | Solvent selection should take oxygen atmosphere into account. Very toxic to aquatic organisms.                        |
| CuCl <sub>2</sub> , Alumina        | Copper chloride, Alumina                     | 7447-39-4               | 3   | 6               | 3.8       | Very toxic to aquatic organisms.                                                                                      |
| Sodium dichloroisocyanurate        | Sodium dichloroisocyanurate                  | 2893-78-9               | 2   | 7               | 3.3       | Risk of explosion. May cause fire. Both halogens present may react, although rates of reaction may vary in each case. |
| Hexachloroethane                   | Hexachloroethane                             | 67-72-1                 | 3   | 4               | 3.2       | Limited evidence of a carcinogenic effect.                                                                            |
| TCCA                               | Trichloroisocyanuric acid                    | 87-90-1                 | 2   | 4               | 3.1       | Very toxic to aquatic organisms. All halogens present may react, although rates of reaction may vary in each case.    |

Figure S4: GSK C-H Chlorination Green Reagent Guide. a) Front of guide with overview, b) Reverse of guide with more detail.

a)

| GSK Reagent Selection Guide – Deoxychlorination    |                             |                                         |
|----------------------------------------------------|-----------------------------|-----------------------------------------|
| Few Issues                                         | Some Issues                 | Major Issues                            |
| Bu <sub>4</sub> NCl, P <sub>2</sub> O <sub>5</sub> | Oxalyl chloride             | Trichloroacetonitrile, PPh <sub>3</sub> |
|                                                    |                             | POCl <sub>3</sub>                       |
|                                                    | Thionyl chloride            | PCl <sub>3</sub>                        |
|                                                    |                             | CCl <sub>4</sub> , PPh <sub>3</sub>     |
|                                                    | Phenylphosphonic dichloride | PCl <sub>5</sub>                        |
|                                                    |                             | Cl <sub>2</sub> , Triphenylphosphite    |
|                                                    | Phenyldichlorophosphate     | Oxalyl chloride, DMF                    |
|                                                    |                             | Thionyl chloride, DMF                   |

This guide should only be used by the expert trained chemist. Before using any reagent listed on this guide, a complete risk assessment must be carried out.

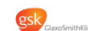

b)

| Material                                           | Full name                                           | CAS number             | EHS | Clean chemistry | Greenness | Comments                                                                                                                                                   |
|----------------------------------------------------|-----------------------------------------------------|------------------------|-----|-----------------|-----------|------------------------------------------------------------------------------------------------------------------------------------------------------------|
| Bu <sub>4</sub> NCl, P <sub>2</sub> O <sub>5</sub> | Tetrabutylammonium chloride<br>Phosphorus pentoxide | 1112-67-0<br>1314-56-3 | 7   | 6               | 6.5       | Limited examples.                                                                                                                                          |
| Oxalyl chloride                                    | Oxalyl chloride                                     | 79-37-8                | 5   | 6               | 5.8       | Lachrymator. Gaseous byproducts.                                                                                                                           |
| Thionyl chloride                                   | Thionyl chloride                                    | 7719-09-7              | 5   | 5               | 5.3       | Lachrymator. Gaseous byproducts.                                                                                                                           |
| Phenylphosphonic dichloride                        | Phenylphosphonic dichloride                         | 824-72-6               | 5   | 5               | 5.0       | Possible high temperatures needed.                                                                                                                         |
| Phenyldichlorophosphate                            | Phenyldichlorophosphate                             | 770-12-7               | 5   | 5               | 5.0       | Limited examples.                                                                                                                                          |
| Trichloroacetonitrile, PPh <sub>3</sub>            | Trichloroacetonitrile<br>Triphenylphosphine         | 545-06-2<br>603-35-0   | 5   | 3               | 4.2       | Danger of serious damage to health by prolonged exposure through inhalation. PPh <sub>3</sub> is a material of concern, future regulatory impact possible. |
| POCl <sub>3</sub>                                  | Phosphorus oxychloride                              | 10025-87-3             | 3   | 6               | 3.8       | Danger of serious damage to health by prolonged exposure through inhalation.                                                                               |
| PCl <sub>3</sub>                                   | Phosphorus trichloride                              | 7719-12-2              | 3   | 5               | 3.7       | Danger of serious damage to health by prolonged exposure through inhalation.                                                                               |
| CCl <sub>4</sub> , PPh <sub>3</sub>                | Carbon tetrachloride<br>Triphenylphosphine          | 56-23-5<br>603-35-0    | 3   | 5               | 3.6       | Limited evidence of carcinogenic effect. Dangerous for the ozone layer, PPh <sub>3</sub> is a material of concern, future regulatory impact possible.      |
| PCl <sub>5</sub>                                   | Phosphorus pentachloride                            | 10026-13-8             | 3   | 5               | 3.4       | Danger of serious damage to health by prolonged exposure through inhalation.                                                                               |
| Cl <sub>2</sub> , Triphenylphosphite               | Chlorine,<br>Triphenylphosphite                     | 101-02-0<br>7782-50-5  | 3   | 4               | 3.2       | Very toxic to aquatic organisms. May cause long-term adverse effects in the aquatic environment.                                                           |
| Oxalyl chloride, DMF                               | Oxalyl chloride,<br>Dimethylformamide catalyst      | 79-37-8<br>68-12-2     | 1   | 5               | 2.5       | DMF typically used in catalytic amounts. DMCC carcinogen may be formed if used in conjunction with DMF.                                                    |
| Thionyl chloride, DMF                              | Thionyl chloride,<br>Dimethylformamide catalyst     | 7719-09-7<br>68-12-2   | 1   | 5               | 2.5       | DMF typically used in catalytic amounts. Risk to unborn child.                                                                                             |

Figure S5: GSK Deoxychlorination Green Reagent Guide. a) Front of guide with overview, b) Reverse of guide with more detail.

## GSK Reagent Selection Guide – Epoxide Formation from Olefin

| Few Issues                                             | Some Issues                                                                  |                                                    | Major Issues                        |
|--------------------------------------------------------|------------------------------------------------------------------------------|----------------------------------------------------|-------------------------------------|
| Enzyme                                                 | $\text{H}_2\text{O}_2$ , $^{\dagger}\text{WO}_3$ or $\text{NaWO}_4$          | $\text{H}_2\text{O}_2$ , $^{\dagger}\text{RuCl}_3$ | <i>m</i> -CPBA                      |
| MMPP                                                   | $\text{H}_2\text{O}_2$ , $^{\dagger}\text{FeCl}_3 \cdot 6\text{H}_2\text{O}$ | Sodium percarbonate                                | $\text{H}_2\text{O}_2$ (>30%), Base |
| $\text{H}_2\text{O}_2$ , $^{\dagger}$ Base             | $\text{O}_2$ , Isobutyraldehyde                                              | Oxone <sup>®</sup> , Acetone                       | Peracetic acid                      |
| $\text{H}_2\text{O}_2$ , $^{\dagger}$ Diketal catalyst | $\text{H}_2\text{O}_2$ , $^{\dagger}\text{MeReO}_3$                          | Urea-Hydrogen peroxide                             | Cumene hydroperoxide                |
| $\text{H}_2\text{O}_2$ , $^{\dagger}$ poly-Leucine     | $\text{H}_2\text{O}_2$ , $^{\dagger}\text{MnSO}_4 \cdot \text{H}_2\text{O}$  | NaOCl, Mn(III) salen complex                       | Sodium Perborate                    |
|                                                        |                                                                              |                                                    | Trichloroisocyanuric acid           |
|                                                        |                                                                              |                                                    | <i>tert</i> -Butyl hydroperoxide    |
|                                                        |                                                                              |                                                    | Sharpless Epoxidation               |

‡ Use of  $\leq 30\%$   $\text{H}_2\text{O}_2$  is required for these procedures to not fall into the “Major Issues” category.

**This guide should only be used by the expert trained chemist. Before using any reagent listed on this guide, a complete risk assessment must be carried out.**

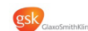

| b) | Material                                                             | Full name                                                                                                  | CAS number                                        | EHS | Clean chemistry | Greenness | Comments                                                                                                              |
|----|----------------------------------------------------------------------|------------------------------------------------------------------------------------------------------------|---------------------------------------------------|-----|-----------------|-----------|-----------------------------------------------------------------------------------------------------------------------|
|    | Enzyme                                                               | Enzyme                                                                                                     | N/A                                               | 10  | 9               | 9.6       |                                                                                                                       |
|    | MMPP                                                                 | Magnesium monoperoxyphthalate hexahydrate                                                                  | 84665-66-7                                        | 10  | 5               | 7.4       |                                                                                                                       |
|    | H <sub>2</sub> O <sub>2</sub> , Base                                 | Hydrogen peroxide (≤30%), Base (e.g. NaOH, NaHCO <sub>3</sub> )                                            | 7722-84-1                                         | 7   | 6               | 6.8       |                                                                                                                       |
|    | H <sub>2</sub> O <sub>2</sub> , Diketal catalyst                     | Hydrogen peroxide (≤30%), 1,2:4,5-di-O-Isopropylidene-β-D-erythro-2,3-hexodiulo-2,6-pyranose               | 7722-84-1<br>18422-53-2                           | 7   | 6               | 6.8       |                                                                                                                       |
|    | H <sub>2</sub> O <sub>2</sub> , poly-Leucine                         | Hydrogen peroxide (≤30%), poly-Leucine                                                                     | 7722-84-1/25322-63-8                              | 7   | 6               | 6.8       |                                                                                                                       |
|    | H <sub>2</sub> O <sub>2</sub> , WO <sub>3</sub> or NaWO <sub>4</sub> | Hydrogen peroxide (≤30%), Tungstic acid or Sodium pertungstate                                             | 7722-84-1<br>7783-03-1 or 10213-10-2              | 7   | 6               | 6.8       | Potential explosion hazard from mixture of hydrogen peroxide with transition metal salt.                              |
|    | H <sub>2</sub> O <sub>2</sub> , FeCl <sub>3</sub> ·6H <sub>2</sub> O | Hydrogen peroxide (≤30%), Iron(III) chloride hexahydrate                                                   | 7722-84-1<br>10025-77-1                           | 7   | 6               | 6.5       | Potential explosion hazard from mixture of hydrogen peroxide with transition metal salt.                              |
|    | O <sub>2</sub> , Isobutyraldehyde                                    | Oxygen, Isobutyraldehyde                                                                                   | 78-84-2                                           | 7   | 6               | 6.5       | Enriched oxygen atmosphere could be safety hazard, especially at elevated temperatures.                               |
|    | H <sub>2</sub> O <sub>2</sub> , MeReO <sub>3</sub>                   | Hydrogen peroxide (≤30%), Methyltrioxorhenium                                                              | 7722-84-1<br>70197-13-6                           | 7   | 6               | 6.5       | Potential explosion hazard from mixture of hydrogen peroxide with transition metal salt.                              |
|    | H <sub>2</sub> O <sub>2</sub> , MnSO <sub>4</sub> ·H <sub>2</sub> O  | Hydrogen peroxide (≤30%), Manganese(II) sulfate monohydrate                                                | 7722-84-1<br>10034-96-5                           | 5   | 7               | 6.0       | Potential explosion hazard from mixture of hydrogen peroxide with transition metal salt.                              |
|    | H <sub>2</sub> O <sub>2</sub> , Fe(acac) <sub>3</sub>                | Hydrogen peroxide (≤30%), Ferric acetylacetonate                                                           | 7722-84-1<br>10025-77-1                           | 7   | 5               | 5.8       | Potential explosion hazard from mixture of hydrogen peroxide with transition metal salt.                              |
|    | H <sub>2</sub> O <sub>2</sub> , RuCl <sub>3</sub>                    | Hydrogen peroxide (≤30%), Ruthenium(III) chloride (unsolvated or hydrate)                                  | 7722-84-1<br>10049-08-8 or 14898-67-0 or 815-94-6 | 7   | 5               | 5.6       | Potential explosion hazard from mixture of hydrogen peroxide with transition metal salt.                              |
|    | Sodium percarbonate                                                  | Sodium percarbonate                                                                                        | 15630-89-4                                        | 5   | 5               | 5.4       |                                                                                                                       |
|    | Oxone®, Acetone                                                      | Potassium monoperoxyulfate, Acetone                                                                        | 37222-66-5/67-64-1                                | 5   | 5               | 5.1       | Oxone is highly exothermic & less stable above pH 7. May be unstable in the presence of H <sub>2</sub> O above 70 °C. |
|    | Urea-Hydrogen peroxide                                               | Urea-Hydrogen peroxide                                                                                     | 124-43-6                                          | 5   | 5               | 5.0       |                                                                                                                       |
|    | NaOCl, Mn(III) salen complex                                         | Sodium hypochlorite, N,N'-bis(3,5-Di-tert-butylsalicylidene)-1,2-cyclohexanediainnomanganese(III) chloride | 7681-52-9<br>135620-04-1                          | 4   | 6               | 4.8       |                                                                                                                       |
|    | m-CPBA                                                               | meta-Chloroperoxybenzoic acid                                                                              | 937-14-4                                          | 3   | 7               | 4.3       | Heating may cause explosion.                                                                                          |
|    | H <sub>2</sub> O <sub>2</sub> (>30%), Base                           | Hydrogen peroxide (>30%), Base                                                                             | 7722-84-1                                         | 5   | 3               | 4.1       | Explosive risk.                                                                                                       |
|    | Peracetic acid                                                       | Peracetic acid                                                                                             | 79-21-0                                           | 2   | 7               | 3.7       | Causes severe burns. May cause fire. Reacts violently with water.                                                     |
|    | Cumene hydroperoxide                                                 | α,α-Dimethylbenzyl hydroperoxide                                                                           | 80-15-9                                           | 2   | 6               | 3.4       | Causes burns. May cause fire.                                                                                         |
|    | NaBO <sub>3</sub>                                                    | Sodium perborate                                                                                           | 10486-00-7 or 7632-04-4                           | 1   | 7               | 3.1       | Contact with combustible material may cause fire. Risk of impaired fertility. Possible harm to the unborn child.      |
|    | TCCA                                                                 | Trichloroisocyanuric acid                                                                                  | 87-90-1                                           | 2   | 4               | 3.0       | Very toxic to aquatic organisms.                                                                                      |
|    | tert-Butyl hydroperoxide                                             | tert-Butyl hydroperoxide                                                                                   | 75-91-2                                           | 1   | 7               | 2.7       | Sensitive to shocks, sparks. May react explosively with reducing agents.                                              |
|    | Sharpless epoxidation                                                | tert-Butyl hydroperoxide, Diisopropyl L-tartrate, Titanium(IV) isopropoxide.                               | 75-91-2/2217-15-4<br>546-68-9                     | 1   | 6               | 2.5       | t-BuOOH is sensitive to shocks, sparks. May react explosively with reducing agents.                                   |

**Figure S6: GSK Epoxide Formation From Olefin Green Reagent Guide.** a) Front of guide with overview, b) Reverse of guide with more detail.

a)

| GSK Reagent Selection Guide – Ester Formation |                                      |                         |
|-----------------------------------------------|--------------------------------------|-------------------------|
| Few Issues                                    | Some Issues                          | Major Issues            |
| Enzyme                                        | Mukaiyama reagent                    |                         |
| Solid supported acid catalysts                | COMU®                                | Boric acid              |
| HCl                                           | I <sub>2</sub> catalytic             | Triphosgene             |
| H <sub>2</sub> SO <sub>4</sub>                | TMSCI                                | Methyl iodide           |
| Dimesitylammonium pentafluorobenzenesulfonate | Et <sub>3</sub> N, MgBr <sub>2</sub> | TMS-diazomethane        |
| Diphenylammonium triflate                     | Thionyl chloride                     | Diazomethane            |
| Acetyl chloride                               | Oxalyl chloride                      | DIAD, Ph <sub>3</sub> P |
|                                               |                                      | DCC, DMAP               |

This guide should only be used by the expert trained chemist. Before using any reagent listed on this guide, a complete risk assessment must be carried out.

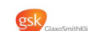

b)

| Material                                      | Full name                                                                                     | CAS number              | EHS | Clean chemistry | Greenness | Comments                                                                                                                     |
|-----------------------------------------------|-----------------------------------------------------------------------------------------------|-------------------------|-----|-----------------|-----------|------------------------------------------------------------------------------------------------------------------------------|
| Enzyme                                        | Enzyme                                                                                        | N/A                     | 10  | 9               | 9.6       |                                                                                                                              |
| Solid supported acid catalysts                | Smopex-101 catalyst, Amberlyst 15, Dowex                                                      | N/A                     | 10  | 6               | 9.6       |                                                                                                                              |
| HCl                                           | Hydrogen chloride                                                                             | 7647-01-0               | 7   | 9               | 8.3       | Corrosive gas.                                                                                                               |
| H <sub>2</sub> SO <sub>4</sub>                | Sulfuric acid                                                                                 | 7664-93-9               | 7   | 9               | 8.3       | Highly corrosive.                                                                                                            |
| Dimesitylammonium pentafluorobenzenesulfonate | Dimesitylammonium pentafluorobenzenesulfonate                                                 | 850629-65-1             | 10  | 6               | 7.7       |                                                                                                                              |
| Diphenylammonium triflate                     | Diphenylammonium trifluoromethanesulfonate                                                    | 164411-06-7             | 10  | 6               | 7.7       |                                                                                                                              |
| Acetyl chloride                               | Acetyl chloride                                                                               | 75-36-5                 | 5   | 9               | 7.1       | Exothermic reaction.                                                                                                         |
| Mukaiyama reagent                             | 2-Chloro-1-methylpyridinium iodide                                                            | 14338-32-0              | 10  | 4               | 6.5       | Recommended storage at +4 °C.                                                                                                |
| COMU®                                         | (1-Cyano-2-ethoxy-2-oxoethylidenaminoxy)dimethylaminomorpholino carbenium hexafluorophosphate | 1075198-30-9            | 10  | 4               | 6.5       | Water soluble byproduct.                                                                                                     |
| I <sub>2</sub> catalytic                      | Iodine                                                                                        | 7553-56-2               | 7   | 6               | 6.4       | Very toxic to aquatic organisms.                                                                                             |
| TMSCI                                         | Trimethylsilyl chloride                                                                       | 75-77-4                 | 5   | 7               | 6.3       | Corrosive. Flammable.                                                                                                        |
| Et <sub>3</sub> N, MgBr <sub>2</sub>          | Triethylamine, Magnesium bromide                                                              | 121-44-8<br>13446-53-2  | 5   | 6               | 5.8       | Reaction between alcohols, anhydrides.                                                                                       |
| Thionyl chloride                              | Thionyl chloride                                                                              | 7719-09-7               | 5   | 6               | 5.5       | Lachrymator. Gaseous byproducts.                                                                                             |
| Oxalyl chloride                               | Oxalyl chloride                                                                               | 79-37-8                 | 5   | 5               | 5.0       | Lachrymator. Gaseous byproducts. Scored for usage on own, usage with DMF not recommended as DMCC carcinogen may be produced. |
| Boric acid                                    | Boric acid                                                                                    | 10043-35-3              | 2   | 9               | 4.1       | May damage fertility. May damage the unborn child.                                                                           |
| Methyl iodide                                 | Methyl iodide                                                                                 | 74-88-4                 | 3   | 6               | 4.0       | Limited evidence of carcinogenic effect.                                                                                     |
| EDCI (WSCDI), DMAP                            | [1-(3-dimethylaminopropyl)-3-ethylcarbodiimide hydrochloride], Dimethylaminopyridine          | 25952-53-8<br>1122-58-3 | 3   | 5               | 4.0       | Water soluble byproduct. EDCI known to be Ames positive.                                                                     |
| Dimethylsulfate                               | Dimethylsulfate                                                                               | 77-78-1                 | 2   | 7               | 3.6       | Material of concern. May cause cancer.                                                                                       |
| DCC, DMAP                                     | N,N'-Dicyclohexylcarbodiimide, Dimethylaminopyridine                                          | 538-75-0<br>1122-58-3   | 3   | 3               | 3.3       | DCC is a material of concern. Risk of serious damage to the eyes.                                                            |
| Triphosgene                                   | Bis(trichloromethyl) carbonate                                                                | 32315-10-9              | 3   | 3               | 2.8       | Substitution recommended. Contact with water forms phosgene.                                                                 |
| TMS-diazomethane                              | Trimethylsilyldiazomethane                                                                    | 18107-18-1              | 1   | 5               | 2.6       | Has been implicated in fatalities.                                                                                           |
| Diazomethane                                  | Diazomethane                                                                                  | 334-88-3                | 1   | 5               | 2.6       | An extremely sensitive explosive gas.                                                                                        |
| DIAD, Ph <sub>3</sub> P                       | Diisopropylazodicarboxylate, Triphenylphosphine                                               | 2446-83-5<br>603-35-0   | 3   | 2               | 2.5       | Triphenyl phosphine is a material of concern. DIAD has limited evidence of carcinogenic effect.                              |

Figure S7: GSK Ester Formation Green Reagent Guide. a) Front of guide with overview, b) Reverse of guide with more detail.



a)

## GSK Reagent Selection Guide – Ether Formation

| Few Issues                     | Some Issues          |                   | Major Issues                                           |
|--------------------------------|----------------------|-------------------|--------------------------------------------------------|
| Methyltransferase              | NaH                  | KOt-Bu            | CuI, K <sub>3</sub> PO <sub>4</sub>                    |
|                                |                      |                   | CTAB, NaOH                                             |
| K <sub>2</sub> CO <sub>3</sub> | FeSO <sub>4</sub>    | NaOEt             | KH                                                     |
| NaOH                           | DBU                  | TBAB, NaOH        | DIAD, PPh <sub>3</sub>                                 |
|                                |                      |                   | Cs <sub>2</sub> CO <sub>3</sub>                        |
| KF-Alumina, 18-C-6             | Yb(OTf) <sub>3</sub> | Ag <sub>2</sub> O | Cs <sub>2</sub> CO <sub>3</sub> , Pd(OAc) <sub>2</sub> |

This guide should only be used by the expert trained chemist. Before using any reagent listed on this guide, a complete risk assessment must be carried out.

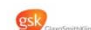

| b) | Material                                               | Full name                                        | CAS number                 | EHS | Clean chemistry | Greenness | Comments                                                                                                                          |
|----|--------------------------------------------------------|--------------------------------------------------|----------------------------|-----|-----------------|-----------|-----------------------------------------------------------------------------------------------------------------------------------|
|    | Methyltransferase                                      | Methyltransferase enzyme                         | N/A                        | 10  | 8               | 9.0       |                                                                                                                                   |
|    | K <sub>2</sub> CO <sub>3</sub>                         | Potassium carbonate                              | 584-08-7                   | 9   | 7               | 8.1       |                                                                                                                                   |
|    | NaOH                                                   | Sodium hydroxide                                 | 1310-73-2                  | 7   | 8               | 7.7       |                                                                                                                                   |
|    | KF-Alumina, 18-C-6                                     | Potassium fluoride-Alumina, 18-Crown-6           | 7789-23-2<br>17445-13-9    | 7   | 8               | 7.4       | Phenol with aryl halide. KF on alumina may not be compatible with glass vessels.                                                  |
|    | NaH                                                    | Sodium hydride                                   | 7646-60-7                  | 7   | 7               | 7.1       | Use of 60% mineral oil dispersion in THF or 2-MeTHF is preferred over DMF or DMA.                                                 |
|    | FeSO <sub>4</sub>                                      | Iron(II) sulfate                                 | 7782-63-0 or<br>15244-10-7 | 9   | 5               | 7.0       | Benzyl halide with primary, secondary, or benzyl alcohol. No base or co-solvent needed.                                           |
|    | DBU                                                    | 1,8-Diazabicyclo[5.4.0]undec-7-ene               | 6674-22-2                  | 7   | 7               | 6.8       | Phenol with alkyl or benzyl halide.                                                                                               |
|    | Yb(OTf) <sub>3</sub>                                   | Ytterbium triflate                               | 54761-04-5                 | 7   | 6               | 6.6       | Condensation of benzyl alcohol (having a group which can stabilize the benzyl cation intermediate) with alkyl alcohol.            |
|    | KOt-Bu                                                 | Potassium tert-butoxide                          | 865-47-4                   | 5   | 8               | 6.6       |                                                                                                                                   |
|    | NaOEt                                                  | Sodium ethoxide                                  | 141-52-6                   | 5   | 8               | 6.4       |                                                                                                                                   |
|    | TBAB, NaOH                                             | Tetrabutylammonium bromide, Sodium hydroxide     | 1643-19-2<br>1310-73-2     | 7   | 5               | 6.0       | Phase transfer conditions.                                                                                                        |
|    | Ag <sub>2</sub> O                                      | Silver(I) oxide                                  | 20667-12-3                 | 5   | 7               | 6.0       | Benzyl bromide with alcohol.                                                                                                      |
|    | CuI, K <sub>3</sub> PO <sub>4</sub>                    | Copper(I) iodide, Potassium phosphate tribasic   | 7681-65-4<br>7778-53-2     | 3   | 6               | 4.0       | Very toxic to aquatic organisms. Risk of serious damage to the eyes.                                                              |
|    | CTAB, NaOH                                             | Cetyltrimethylammonium bromide, Sodium hydroxide | 57-09-0<br>1310-73-2       | 3   | 5               | 3.4       | Very toxic to aquatic organisms. Causes severe burns.                                                                             |
|    | KH                                                     | Potassium hydride                                | 7693-26-7                  | 1   | 8               | 3.4       | Base oil is a potential carcinogen (R45), depending on supplier. If supplied in a non-R45 base oil, KH would score closer to NaH. |
|    | DIAD, PPh <sub>3</sub>                                 | Diisopropylazodicarboxylate, Triphenylphosphine  | 2446-83-5<br>603-35-0      | 3   | 4               | 3.0       | Triphenylphosphine is a material of concern, DIAD has limited evidence of a carcinogenic effect.                                  |
|    | Cs <sub>2</sub> CO <sub>3</sub>                        | Cesium carbonate                                 | 534-17-8                   | 2   | 5               | 2.9       | Possible risk of irreversible effects.                                                                                            |
|    | Cs <sub>2</sub> CO <sub>3</sub> , Pd(OAc) <sub>2</sub> | Cesium carbonate, Palladium(II) acetate          | 534-17-8<br>3375-31-3      | 2   | 5               | 2.9       | Possible risk of irreversible effects.                                                                                            |

Figure S8: GSK Ether Formation Green Reagent Guide. a) Front of guide with overview, b) Reverse of guide with more detail.

a)

| Few Issues                          | Some Issues                            | Major Issues            |
|-------------------------------------|----------------------------------------|-------------------------|
| <i>N</i> -Fluoropyridinium triflate | Deoxofluor™                            | Et <sub>3</sub> N · 3HF |
| <i>N</i> -Fluorobenzenesulfonimide  | CsF, Pd(II) catalyst                   | HF                      |
| Me <sub>4</sub> NF                  | Fluolead™                              | HF-Pyridine             |
| TBAF                                | Selectfluor™                           | DAST                    |
| Accufluor™                          | TBAT, Perfluorobutanesulfonyl fluoride | F <sub>2</sub>          |

This guide should only be used by the expert trained chemist. Before using any reagent listed on this guide, a complete risk assessment must be carried out.



b)

| Material                               | Full name                                                                       | CAS number              | EHS | Clean chemistry | Greenness | Comments                                                                    |
|----------------------------------------|---------------------------------------------------------------------------------|-------------------------|-----|-----------------|-----------|-----------------------------------------------------------------------------|
| <i>N</i> -Fluoropyridinium triflate    | <i>N</i> -Fluoropyridinium triflate                                             | 107263-95-6             | 9   | 6               | 7.3       | C-H fluorination. Causes severe burns.                                      |
| NFSI                                   | <i>N</i> -Fluorobenzenesulfonimide                                              | 133745-75-2             | 10  | 4               | 6.5       | C-H fluorination.                                                           |
| Me <sub>4</sub> NF                     | Tetramethylammonium fluoride                                                    | 373-68-2                | 9   | 5               | 6.4       | Halogen exchange and fluorodenitration.                                     |
| TBAF                                   | Tetrabutylammonium fluoride                                                     | 429-41-4                | 7   | 5               | 6.1       | Deoxyfluorination. Causes burns.                                            |
| Accufluor™                             | 1-Fluoro-4-hydroxy-1,4-diazabicyclo[2.2.2]octane bis(tetrafluoroborate)         | 162241-33-0             | 7   | 5               | 6.1       | C-H fluorination. Danger of serious damage to health by prolonged exposure. |
| Deoxofluor™                            | Bis(2-methoxyethyl)aminosulfur trifluoride                                      | 202289-38-1             | 5   | 6               | 5.8       | Deoxyfluorination. Causes severe burns. Reacts violently with water.        |
| CsF, Pd(II) catalyst                   | Cesium fluoride, Palladium (II) catalyst                                        | 13400-13-0              | 7   | 4               | 5.4       | Deoxyfluorination.                                                          |
| Fluolead™                              | 4- <i>tert</i> -Butyl-2,6-dimethylphenylsulfur trifluoride                      | 947725-04-4             | 5   | 5               | 5.3       | Deoxyfluorination. Causes burns.                                            |
| Selectfluor™                           | 1-Chloromethyl-4-fluoro-1,4-diazoniabicyclo[2.2.2]octane bis(tetrafluoroborate) | 140681-55-6             | 7   | 4               | 4.8       | Incompatible with DMF and DMSO.                                             |
| TBAT, Perfluorobutanesulfonyl fluoride | Tetrabutylammonium difluorotriphenylsilicate, Nonafluorobutanesulfonyl fluoride | 163931-61-1<br>375-72-4 | 5   | 4               | 4.6       | Deoxyfluorination. Causes burns.                                            |
| Et <sub>3</sub> N · 3HF                | Triethylamine trihydrofluoride                                                  | 73602-61-6              | 3   | 6               | 4.5       | Causes severe burns.                                                        |
| HF                                     | Hydrogen fluoride                                                               | 7664-39-3               | 3   | 5               | 3.8       | Extremely corrosive. Special vessel necessary; avoid contact with glass.    |
| HF-Pyridine                            | HF-Pyridine complex (70:30)                                                     | 62778-11-4              | 3   | 4               | 3.7       | Causes severe burns. Special vessel necessary; avoid contact with glass.    |
| DAST                                   | Diethylaminosulfur trifluoride                                                  | 38078-09-0              | 3   | 5               | 3.5       | Deoxyfluorination. Causes severe burns. May explode upon heating.           |
| F <sub>2</sub>                         | Fluorine                                                                        | 7782-41-4               | 2   | 5               | 3.0       | Extremely corrosive. Special vessel necessary.                              |

Figure S9: GSK Fluorination Green Reagent Guide. a) Front of guide with overview, b) Reverse of guide with more detail.

a)

| Few Issues  | Some Issues                                     | Major Issues                                                                    |
|-------------|-------------------------------------------------|---------------------------------------------------------------------------------|
|             | ICI                                             |                                                                                 |
|             | Benzyltrimethylammonium dichloroiodate          | NaI, Chloramine-T                                                               |
|             |                                                 | NaI, Tosyl chloride                                                             |
| HI          | Pyridinium ICI                                  | NaI, NaOCl                                                                      |
|             | KI, H <sub>2</sub> O <sub>2</sub> <sup>‡</sup>  | I <sub>2</sub> , KIO <sub>3</sub>                                               |
| KI, HI, NCS | KI, Ammonium peroxydisulfate                    | I <sub>2</sub> , Urea-Hydrogen peroxide                                         |
|             | TMADCI, H <sub>2</sub> SO <sub>4</sub>          | I <sub>2</sub> , H <sub>2</sub> O <sub>2</sub> <sup>‡</sup>                     |
| NIS, Acid   | NaI, H <sub>2</sub> O <sub>2</sub> <sup>‡</sup> | I <sub>2</sub> , Knochel-Hauser base                                            |
|             | KI, Oxone®                                      | NaI, Tf <sub>2</sub> O, Pyridine                                                |
|             |                                                 | NaI, MsCl                                                                       |
|             |                                                 | Diiododimethylhydantoin                                                         |
|             |                                                 | TICA, Acid                                                                      |
|             |                                                 | I <sub>2</sub> , (Bu <sub>4</sub> N) <sub>2</sub> S <sub>2</sub> O <sub>8</sub> |
|             |                                                 | I <sub>2</sub> , PPh <sub>3</sub>                                               |
|             |                                                 | I <sub>2</sub> , AgNO <sub>3</sub>                                              |
|             |                                                 | I <sub>2</sub> , n-BuLi                                                         |

‡ Use of ≤30% H<sub>2</sub>O<sub>2</sub> is required for these procedures to not fall into the “Major Issues” category.

This guide should only be used by the expert trained chemist. Before using any reagent listed on this guide, a complete risk assessment must be carried out.

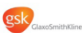

b)

| Material                                                                        | Full name                                                                        | CAS number                       | EHS | Clean chemistry | Greenness | Comments                                                                                                                                                                                                                  |
|---------------------------------------------------------------------------------|----------------------------------------------------------------------------------|----------------------------------|-----|-----------------|-----------|---------------------------------------------------------------------------------------------------------------------------------------------------------------------------------------------------------------------------|
| HI                                                                              | Hydrogen iodide                                                                  | 10034-85-2                       | 7   | 7               | 7.1       | Deoxygenation.                                                                                                                                                                                                            |
| KI, HI, NCS                                                                     | Potassium iodide, Hydroiodic acid<br>N-Chlorosuccinimide                         | 7681-11-0/10034-85-2<br>128-09-6 | 7   | 7               | 7.0       | Forms NIS <i>in situ</i> .                                                                                                                                                                                                |
| NIS, Acid                                                                       | N-Iodosuccinimide, Acid                                                          | 516-12-1                         | 9   | 6               | 7.0       | Examples include deactivated arenes.                                                                                                                                                                                      |
| ICI                                                                             | Iodine Monochloride                                                              | 7790-99-0                        | 7   | 6               | 6.6       |                                                                                                                                                                                                                           |
| Benzyltrimethylammonium Dichloroiodate                                          | Benzyltrimethylammonium dichloroiodate                                           | 114971-52-7                      | 10  | 4               | 6.3       |                                                                                                                                                                                                                           |
| Pyridinium ICI                                                                  | Pyridinium iodochloride (PyrICI)                                                 | 6643-90-0                        | 5   | 7               | 6.3       |                                                                                                                                                                                                                           |
| KI, H <sub>2</sub> O <sub>2</sub>                                               | Potassium iodide, Hydrogen peroxide (≤30%)                                       | 7681-11-0<br>7722-84-1           | 5   | 6               | 5.8       | KI will react with hydrogen peroxide with the evolution of significant heat, possibly oxygen. These reactions can proceed with violent force, may be highly hazardous.                                                    |
| KI, Ammonium peroxydisulfate                                                    | Potassium iodide, Ammonium peroxydisulfate                                       | 7681-11-0<br>7727-54-0           | 5   | 6               | 5.8       | KI can potentially react with oxidants to evolve heat, oxygen with hazardous consequences.                                                                                                                                |
| TMADCI, H <sub>2</sub> SO <sub>4</sub>                                          | Tetramethylammonium dichloroiodate, Sulfuric acid                                | 1838-41-1/7664-93-9              | 7   | 4               | 5.7       | Examples include deactivated arenes.                                                                                                                                                                                      |
| NaI, H <sub>2</sub> O <sub>2</sub>                                              | Sodium iodide, Hydrogen peroxide (≤30%)                                          | 7681-82-5<br>7722-84-1           | 5   | 6               | 5.6       | NaI will react with hydrogen peroxide with the evolution of significant heat, possibly oxygen. These reactions can proceed with violent force, may be highly hazardous.                                                   |
| KI, Oxone®                                                                      | Potassium iodide, Potassium monopersulfate                                       | 7681-11-0<br>37222-66-5          | 5   | 6               | 5.6       | KI can potentially react with oxidants to evolve heat & O <sub>2</sub> with hazardous consequences. Oxone is highly exothermic & less stable above pH 7. May be unstable in the presence of H <sub>2</sub> O above 70 °C. |
| NaI, Chloramine-T                                                               | Sodium iodide, Chloramine-T                                                      | 7681-82-5/7080-50-4              | 5   | 5               | 5.3       | Examples include deactivated arenes.                                                                                                                                                                                      |
| NaI, Tosyl chloride                                                             | Sodium iodide, p-Toluenesulfonyl chloride                                        | 7681-82-5/98-59-9                | 5   | 5               | 5.3       | Deoxygenation.                                                                                                                                                                                                            |
| NaI, NaOCl                                                                      | Sodium iodide, Sodium hypochlorite                                               | 7681-52-9                        | 4   | 7               | 5.2       | NaI can potentially react with oxidants to evolve heat, oxygen with hazardous consequences.                                                                                                                               |
| I <sub>2</sub> , KIO <sub>3</sub>                                               | Iodine, Potassium iodate                                                         | 7553-56-2<br>7758-05-6           | 5   | 5               | 5.0       | Iodine can potentially react with oxidants to evolve heat, oxygen with hazardous consequences.                                                                                                                            |
| I <sub>2</sub> , Urea-Hydrogen peroxide                                         | Iodine, Urea-Hydrogen peroxide                                                   | 124-73-6/7553-56-2               | 4   | 6               | 4.8       | Examples include deactivated arenes.                                                                                                                                                                                      |
| I <sub>2</sub> , H <sub>2</sub> O <sub>2</sub>                                  | Iodine, Hydrogen peroxide (≤30%)                                                 | 7553-56-2<br>7722-84-1           | 4   | 5               | 4.4       | Iodine will react with hydrogen peroxide with the evolution of significant heat, possibly oxygen. These reactions can proceed with violent force, may be highly hazardous.                                                |
| I <sub>2</sub> , Knochel-Hauser base                                            | Iodine, 2,2,6,6-Tetramethylpiperidyl magnesium chloride-Lithium chloride complex | 7553-56-2<br>898838-07-8         | 4   | 5               | 4.4       |                                                                                                                                                                                                                           |
| NaI, Tf <sub>2</sub> O, Pyridine                                                | Sodium iodide, Triflic anhydride, Pyridine                                       | 7681-82-5/358-23-6<br>110-86-1   | 4   | 4               | 4.1       |                                                                                                                                                                                                                           |
| NaI, MsCl                                                                       | Sodium iodide, Methanesulfonyl chloride                                          | 7681-82-5<br>124-63-0            | 3   | 5               | 3.6       | Deoxygenation. May causes sensitization.                                                                                                                                                                                  |
| Diiododimethylhydantoin                                                         | Diiododimethylhydantoin                                                          | 2232-12-4                        | 2   | 5               | 3.2       | Causes severe burns. Very toxic to aquatic organisms.                                                                                                                                                                     |
| TICA, Acid                                                                      | Triiodoisocyanuric acid in Acid                                                  | 27694-85-5                       | 2   | 4               | 3.1       | Very toxic to aquatic organisms. Not commercially available.                                                                                                                                                              |
| I <sub>2</sub> , (Bu <sub>4</sub> N) <sub>2</sub> S <sub>2</sub> O <sub>8</sub> | Iodine, Bis(tetrabutylammonium) peroxydisulfate                                  | 7553-56-2<br>88505-29-7          | 2   | 4               | 3.1       | May cause fire. Iodine can potentially react with oxidants to evolve heat, oxygen with hazardous consequences.                                                                                                            |
| I <sub>2</sub> , PPh <sub>3</sub>                                               | Iodine, Triphenylphosphine                                                       | 7553-56-2/603-35-0               | 3   | 4               | 3.0       | Deoxygenation. Toxic to aquatic organisms. PPh <sub>3</sub> is a material of concern, future regulatory impact possible.                                                                                                  |
| I <sub>2</sub> , AgNO <sub>3</sub>                                              | Iodine, Silver nitrate                                                           | 7553-56-2/7761-88-8              | 2   | 5               | 3.0       | Causes burns. Very toxic to aquatic organisms.                                                                                                                                                                            |
| I <sub>2</sub> , n-BuLi                                                         | Iodine, n-Butyllithium                                                           | 7553-56-2<br>109-72-8            | 1   | 4               | 2.4       | Very toxic to aquatic organisms. Possible risk of impaired fertility. Very flammable. Causes burns.                                                                                                                       |

Figure S10: GSK Iodination Green Reagent Guide. a) Front of guide with overview, b) Reverse of guide with more detail.

a)

| GSK Reagent Selection Guide – Ketone Reduction     |  |                                  |                                   |
|----------------------------------------------------|--|----------------------------------|-----------------------------------|
| Few Issues                                         |  | Some Issues                      | Major Issues                      |
| Ketone reductase                                   |  | LiBH <sub>4</sub>                | LiEt <sub>3</sub> BH              |
| Zeolite-beta MPV catalyst                          |  | Catecholborane                   | Sodium dithionite                 |
| Baker's yeast                                      |  | Borane-THF                       | DIBAL                             |
| H <sub>2</sub> , Pd/C                              |  | Et <sub>3</sub> SiH, TFA         | Nickel boride                     |
| H <sub>2</sub> , Pt/C                              |  | Red Al                           | Zn(BH <sub>4</sub> ) <sub>2</sub> |
| H <sub>2</sub> , Ir                                |  | Bu <sub>4</sub> NBH <sub>4</sub> | H <sub>2</sub> , Raney Ni         |
| PPh <sub>3</sub> -Copper hydride, PMHS             |  | Ammonium formate, Pd/C           | NaBH <sub>3</sub> CN              |
| H <sub>2</sub> , Rh/Al <sub>2</sub> O <sub>3</sub> |  | Al(Oi-Pr) <sub>3</sub>           |                                   |
|                                                    |  | Na(OAc) <sub>3</sub> BH          |                                   |

This guide should only be used by the expert trained chemist. Before using any reagent listed on this guide, a complete risk assessment must be carried out.

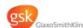

b)

| Material                                           | Full name                                       | CAS number               | EHS | Clean chemistry | Greenness | Comments                                                                                                                                                       |
|----------------------------------------------------|-------------------------------------------------|--------------------------|-----|-----------------|-----------|----------------------------------------------------------------------------------------------------------------------------------------------------------------|
| KRED                                               | Ketone reductase enzyme                         | N/A                      | 10  | 9               | 9.3       |                                                                                                                                                                |
| Zeolite-beta MPV catalyst                          | Zeolite-beta MPV catalyst                       | N/A                      | 10  | 9               | 9.3       | Heterogeneous catalyst for MPV reaction.                                                                                                                       |
| Baker's yeast                                      | Baker's yeast enzyme                            | N/A                      | 10  | 8               | 8.7       | Whole cell and purified reductase conditions known.                                                                                                            |
| H <sub>2</sub> , Pd/C                              | Hydrogen, Palladium on Carbon                   | 1333-74-0/7440-05-3      | 7   | 7               | 7.2       | Flammable. Relative cost cheap. Catalyst can be recycled.                                                                                                      |
| H <sub>2</sub> , Pt/C                              | Hydrogen, Platinum on Carbon                    | 1333-74-0/7440-06-4      | 7   | 7               | 7.2       | Flammable. Expensive. Catalyst can be recycled.                                                                                                                |
| H <sub>2</sub> , Ir                                | Hydrogen, Iridium                               | 1333-74-0/7439-88-5      | 7   | 7               | 7.1       | Flammable. Expensive. Catalyst can be recycled.                                                                                                                |
| PPh <sub>3</sub> -Copper hydride, PMHS             | Triphenylphosphine-Copper hydride hexamer, PMHS | 33636-93-0<br>63148-57-2 | 10  | 5               | 7.0       |                                                                                                                                                                |
| H <sub>2</sub> , Rh/Al <sub>2</sub> O <sub>3</sub> | Hydrogen, Rh on Aluminum oxide                  | 1333-74-0<br>7440-16-6   | 7   | 6               | 6.8       | Flammable. Extremely expensive. Other groups susceptible to reduction.                                                                                         |
| LiBH <sub>4</sub>                                  | Lithium borohydride                             | 16949-15-8               | 5   | 8               | 6.6       | Intermediate reactivity between NaBH <sub>4</sub> and LAH.                                                                                                     |
| Borane-THF                                         | Borane-Tetrahydrofuran                          | 14044-65-6               | 5   | 8               | 6.6       | Flammable.                                                                                                                                                     |
| NaBH <sub>4</sub>                                  | Sodium borohydride                              | 16940-66-2               | 5   | 8               | 6.6       |                                                                                                                                                                |
| LiAlH <sub>4</sub>                                 | Lithium aluminum hydride                        | 16853-85-3               | 5   | 7               | 6.1       | Other groups susceptible to reduction.                                                                                                                         |
| Ammonium formate, Pd/C                             | Ammonium formate, Palladium on Carbon           | 540-69-2<br>7440-05-3    | 7   | 5               | 5.8       | Hydrogen transfer. Reaction rates and off-gassing rates may be a concern on some systems.                                                                      |
| Al(Oi-Pr) <sub>3</sub>                             | Aluminum isopropoxide                           | 555-31-7                 | 5   | 6               | 5.8       |                                                                                                                                                                |
| Catecholborane                                     | Catecholborane                                  | 274-07-7                 | 5   | 6               | 5.6       | Flammable.                                                                                                                                                     |
| Et <sub>3</sub> SiH, TFA                           | Triethylsilane, Trifluoroacetic acid            | 617-86-7/776-05-1        | 5   | 6               | 5.5       | Flammable. Corrosive.                                                                                                                                          |
| Red Al                                             | Sodium bis(2-methoxyethoxy) aluminum dihydride  | 22722-98-1               | 4   | 7               | 5.2       | Flammable. Causes burns. Danger of serious health damage by prolonged exposure. Currently only available in toluene – poses possible risk to the unborn child. |
| Bu <sub>4</sub> NBH <sub>4</sub>                   | Tetrabutylammonium borohydride                  | 33745-74-5               | 5   | 5               | 5.0       | Reduces ketones in aprotic solvent                                                                                                                             |
| Na(OAc) <sub>3</sub> BH                            | Sodium triacetoxyborohydride                    | 56553-60-7               | 5   | 5               | 5.0       | Limited scope for ketone reduction.                                                                                                                            |
| LiEt <sub>3</sub> BH                               | Lithium triethylborohydride                     | 22560-16-3               | 3   | 9               | 4.7       | Super Hydride. Spontaneously flammable in air.                                                                                                                 |
| Sodium dithionite                                  | Sodium dithionite                               | 7775-14-6                | 3   | 5               | 3.8       | May cause fire. Contact with acids liberates toxic gas.                                                                                                        |
| DIBAL                                              | Diisobutylaluminum hydride                      | 1191-15-7                | 2   | 7               | 3.7       | Spontaneously flammable in air. Reacts violently with water to liberate extremely flammable gases.                                                             |
| Nickel boride                                      | Nickel boride                                   | 12007-01-1               | 2   | 7               | 3.6       | May cause cancer.                                                                                                                                              |
| Zn(BH <sub>4</sub> ) <sub>2</sub>                  | Zinc borohydride                                | 17611-70-0               | 2   | 5               | 3.3       | Prepared from NaBH <sub>4</sub> and ZnCl <sub>2</sub> . Causes burns. Very toxic to aquatic organisms.                                                         |
| H <sub>2</sub> , Raney Ni                          | Hydrogen, Raney nickel                          | 1333-74-0<br>7440-02-0   | 1   | 6               | 3.0       | Highly flammable. Potential carcinogen and sensitizer.                                                                                                         |
| NaBH <sub>3</sub> CN                               | Sodium cyanoborohydride                         | 25895-60-7               | 1   | 5               | 2.3       | Explosive when mixed with oxidizing substances. Very toxic. Contact with acid liberates very toxic gas.                                                        |

Figure S11: GSK Ketone Reduction Green Reagent Guide. a) Front of guide with overview, b) Reverse of guide with more detail.

a)

## GSK Reagent Selection Guide – Nitro Reduction

| Few Issues                              | Some Issues              |                                     | Major Issues                                    |
|-----------------------------------------|--------------------------|-------------------------------------|-------------------------------------------------|
| <b>Nitroreductase</b>                   |                          |                                     | <b>Na<sub>2</sub>S<sub>2</sub>O<sub>4</sub></b> |
| H <sub>2</sub> , Pt/V on C              | Fe, NH <sub>4</sub> Cl   | Et <sub>3</sub> SiH, Pd/C           | Zn, NH <sub>4</sub> Cl                          |
| H <sub>2</sub> , Pd/C                   |                          |                                     | Zn, AcOH                                        |
| H <sub>2</sub> , Pd(OH) <sub>2</sub> /C | NaBH <sub>4</sub> , Pd/C | Fe, AcOH                            | Hydrazine, Metal                                |
| H <sub>2</sub> , Pt/C                   | Ammonium formate, Pd/C   |                                     | H <sub>2</sub> , Raney Ni                       |
| Fe, CaCl <sub>2</sub>                   |                          | Fe, HCl                             | Zn, HCl                                         |
| HI                                      |                          |                                     | Cyclohexene, Pd/C                               |
| NaHS·H <sub>2</sub> O                   | SnCl <sub>2</sub>        | Na <sub>2</sub> S·9H <sub>2</sub> O | NaBH <sub>4</sub> , NiCl <sub>2</sub>           |
| H <sub>2</sub> , PtO <sub>2</sub>       |                          |                                     |                                                 |

This guide should only be used by the expert trained chemist. Before using any reagent listed on this guide, a complete risk assessment must be carried out.

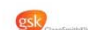

| b) | Material                                      | Full name                               | CAS number                                         | EHS | Clean chemistry | Greenness | Comments                                                                       |
|----|-----------------------------------------------|-----------------------------------------|----------------------------------------------------|-----|-----------------|-----------|--------------------------------------------------------------------------------|
|    | Nitroreductase                                | Nitroreductase enzyme                   | N/A                                                | 10  | 8               | 9.0       |                                                                                |
|    | H <sub>2</sub> , Pt/V on C                    | Hydrogen, Platinum/Vanadium on Carbon   | 1333-74-0<br>7440-62-2/7440-06-4                   | 7   | 8               | 7.5       | Flammable. Relative cost expensive. Catalyst can be recycled.                  |
|    | H <sub>2</sub> , Pd/C                         | Hydrogen, Palladium on Carbon           | 1333-74-0/7440-05-3                                | 7   | 7               | 7.2       | Flammable. Relative cost cheap. Catalyst can be recycled.                      |
|    | H <sub>2</sub> , Pd(OH) <sub>2</sub> /C       | Hydrogen, Palladium hydroxide on Carbon | 1333-74-0/12135-22-7                               | 7   | 7               | 7.2       | Flammable. Slightly more expensive than Pd/C, can be recycled.                 |
|    | H <sub>2</sub> , Pt/C                         | Hydrogen, Platinum on Carbon            | 1333-74-0/7440-6-4                                 | 7   | 7               | 7.2       | Flammable. Relative cost expensive. Catalyst can be recycled.                  |
|    | Fe, CaCl <sub>2</sub>                         | Iron, Calcium chloride                  | 7439-89-6/10043-52-4                               | 7   | 7               | 7.1       | Dissolving metal reduction with potential exotherm.                            |
|    | HI                                            | Hydroiodic acid                         | 10034-85-2                                         | 7   | 5               | 6.3       | Selective reduction of nitro in presence of other functionality.               |
|    | NaHS·H <sub>2</sub> O                         | Sodium hydrogen sulfide hydrate         | 207683-19-0                                        | 5   | 7               | 6.3       | Contact with acids liberates toxic gas.                                        |
|    | H <sub>2</sub> , PtO <sub>2</sub>             | Hydrogen, Platinum oxide                | 1333-74-0/1314-15-4                                | 5   | 7               | 6.1       | Flammable. Relative cost expensive. Catalyst can be recycled.                  |
|    | Fe, NH <sub>4</sub> Cl                        | Iron, Ammonium chloride                 | 7439-89-6/12125-02-9                               | 7   | 5               | 6.0       | Aliphatic or aromatic nitro groups can be reduced.                             |
|    | NaBH <sub>4</sub> , Pd/C                      | Sodium Borohydride, Palladium on Carbon | 16940-66-2/7440-05-3                               | 5   | 6               | 5.9       | Contact with water liberates extremely flammable gases.                        |
|    | Ammonium formate, Pd/C                        | Ammonium formate, Palladium on Carbon   | 540-69-2/7440-05-3                                 | 7   | 5               | 5.8       | Hydrogen transfer. Reaction rates, off-gassing may be a concern.               |
|    | SnCl <sub>2</sub>                             | Tin(II) chloride dihydrate              | 10025-69-1                                         | 7   | 5               | 5.8       | Possible sensitizer.                                                           |
|    | Et <sub>3</sub> SiH, Pd/C                     | Triethylsilane, Palladium on Carbon     | 617-86-7/7440-05-3                                 | 7   | 5               | 5.5       | Hydrogen transfer.                                                             |
|    | Fe, AcOH                                      | Iron in Acetic acid                     | 7439-89-6/64-19-7                                  | 5   | 5               | 5.2       | Causes severe burns.                                                           |
|    | Fe, HCl                                       | Iron in Hydrochloric acid               | 7439-89-6/7647-01-0                                | 5   | 5               | 5.0       | Aliphatic or aromatic nitro groups can be reduced.                             |
|    | Na <sub>2</sub> S·9H <sub>2</sub> O           | Sodium sulfide nonahydrate              | 1313-84-4                                          | 4   | 5               | 4.3       | Contact with acids liberates toxic gas. Very toxic to aquatic organisms.       |
|    | Na <sub>2</sub> S <sub>2</sub> O <sub>4</sub> | Sodium dithionite                       | 7775-14-6                                          | 3   | 5               | 3.6       | May cause fire. Contact with acids liberates toxic gas.                        |
|    | Zn, NH <sub>4</sub> Cl                        | Zinc, Ammonium chloride                 | 7440-66-6/12125-02-9                               | 3   | 5               | 3.4       | Very toxic to aquatic organisms.                                               |
|    | Zn, AcOH                                      | Zinc in Acetic acid                     | 7440-66-6/64-19-7                                  | 2   | 5               | 3.4       | Very toxic to aquatic organisms. Causes severe burns.                          |
|    | Hydrazine, Metal                              | Hydrazine, Metal                        | 7803-57-8                                          | 2   | 7               | 3.3       | Hydrazine is a material of concern, possible carcinogen.                       |
|    | H <sub>2</sub> , Raney Ni                     | Hydrogen, Raney nickel                  | 1333-74-0/7440-02-0                                | 1   | 7               | 3.2       | Highly flammable. Potential carcinogen and sensitizer.                         |
|    | Zn, HCl                                       | Zinc in Hydrochloric acid               | 7440-66-6/7647-01-0                                | 3   | 4               | 3.0       | Very toxic to aquatic organisms.                                               |
|    | Cyclohexene, Pd/C                             | Cyclohexene, Palladium on Carbon        | 110-83-8/7440-05-3                                 | 1   | 6               | 3.0       | Benzene (known carcinogen) forms as byproduct.                                 |
|    | NaBH <sub>4</sub> , NiCl <sub>2</sub>         | Sodium Borohydride, Nickel(II) chloride | 16940-66-2/7791-20-0 OR<br>7718-54-9 OR 69098-15-3 | 1   | 5               | 2.7       | NiCl <sub>2</sub> has many severe risk phrases, including possible carcinogen. |

Figure S12: GSK Nitro Reduction Green Reagent Guide. a) Front of guide with overview, b) Reverse of guide with more detail.

a)

### GSK Reagent Selection Guide – Oxidation to Aldehydes and Ketones

| Few Issues                                 |                                                                | Some Issues            |  | Major Issues                         |                         |
|--------------------------------------------|----------------------------------------------------------------|------------------------|--|--------------------------------------|-------------------------|
| Air, Ru catalyst                           | H <sub>2</sub> O <sub>2</sub> , <sup>‡</sup> NaWO <sub>4</sub> | BaMnO <sub>4</sub>     |  | Air, Cu catalyst                     | IBX                     |
|                                            | Air, Pd catalyst                                               | NaOCl                  |  |                                      |                         |
| Laccase enzyme                             | TEMPO, Co-oxidant                                              | T3P®                   |  | H <sub>2</sub> O <sub>2</sub> (>30%) | NiO                     |
| Ketoreductase enzyme                       |                                                                | Al(Ot-Bu) <sub>3</sub> |  |                                      |                         |
|                                            | MnO <sub>2</sub>                                               | DMSO, DCC              |  | TPAP, NMO                            | PCC                     |
| PIPO, Co-oxidant                           | DMS, NCS                                                       | Zr(Ot-Bu) <sub>4</sub> |  | KMnO <sub>4</sub>                    | Dess-Martin Periodinane |
| H <sub>2</sub> O <sub>2</sub> <sup>‡</sup> | SO <sub>3</sub> -Pyridine                                      | Oxone®                 |  | Cl <sub>2</sub> , Pyridine           | PDC                     |
|                                            | Stabilized IBX                                                 | Oxalyl chloride, DMSO  |  |                                      |                         |

<sup>‡</sup> Use of ≤30% H<sub>2</sub>O<sub>2</sub> is required for these procedures to not fall into the “Major Issues” category.

This guide should only be used by the expert trained chemist. Before using any reagent listed on this guide, a complete risk assessment must be carried out.

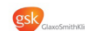

b)

| Material                                          | Full name                                                    | CAS number               | EHS | Clean chemistry | Greenness | Comments                                                                                                                                                 |
|---------------------------------------------------|--------------------------------------------------------------|--------------------------|-----|-----------------|-----------|----------------------------------------------------------------------------------------------------------------------------------------------------------|
| Air, Ruthenium catalyst                           | Air with a ruthenium catalyst (RuO <sub>2</sub> in Zeolite)  | 12036-10-1               | 10  | 8               | 9.0       | Heterogeneous catalyst. Solvent selection should take oxygen atmosphere into account.                                                                    |
| Laccase enzyme                                    | e.g. Laccase, from <i>Trametes versicolor</i>                | 80498-15-3               | 10  | 7               | 8.3       |                                                                                                                                                          |
| Ketoreductase enzyme                              | Ketoreductase or alcohol dehydrogenase                       | 9028-12-0                | 10  | 7               | 8.3       |                                                                                                                                                          |
| PIPO, Co-oxidant                                  | Polymer-immobilized TEMPO on Chimmassorb® 944, Co-oxidant    | 91993-31-6               | 10  | 6               | 7.8       |                                                                                                                                                          |
| H <sub>2</sub> O <sub>2</sub>                     | Hydrogen peroxide (≤30%)                                     | 7722-84-1                | 7   | 7               | 7.2       |                                                                                                                                                          |
| H <sub>2</sub> O <sub>2</sub> , NaWO <sub>4</sub> | Hydrogen peroxide (≤30%), Sodium tungstate                   | 7722-84-1<br>10213-10-2  | 7   | 6               | 6.7       | Potential explosion hazard from mixture of hydrogen peroxide with transition metal salt.                                                                 |
| Air, Pd catalyst                                  | Air, Palladium catalyst                                      | 3375-31-3                | 7   | 6               | 6.3       | Homogeneous catalyst, requires ligand. Solvent selection should take oxygen atmosphere into account.                                                     |
| TEMPO, Co-oxidant                                 | 2,2,6,6-Tetramethylpiperidine 1-oxyl, co-oxidant             | 7789-45-9                | 7   | 5               | 6.1       | Needs catalytic co-oxidant e.g. KBr, NaBr, NaOCl or air on small scale. Solvent selection should take potential oxygen atmosphere into account.          |
| MnO <sub>2</sub>                                  | Manganese dioxide                                            | 1313-13-9                | 9   | 4               | 5.8       | Ensure “activated” manganese dioxide is used.                                                                                                            |
| DMS, NCS                                          | Dimethyl sulfide, N-Chlorosuccinimide                        | 75-18-3<br>128-09-6      | 5   | 6               | 5.8       | DMS stench. Low temp (-25 °C) necessary.                                                                                                                 |
| SO <sub>3</sub> -Pyridine                         | Sulfur trioxide-Pyridine                                     | 26412-87-3               | 7   | 4               | 5.6       |                                                                                                                                                          |
| Stabilized IBX                                    | Stabilized 2-Iodoxybenzoic acid                              | 61717-82-6               | 7   | 4               | 5.4       |                                                                                                                                                          |
| BaMnO <sub>4</sub>                                | Barium manganate                                             | 7787-35-1                | 7   | 4               | 5.4       |                                                                                                                                                          |
| NaOCl                                             | Sodium hypochlorite                                          | 7681-52-9                | 4   | 7               | 5.3       |                                                                                                                                                          |
| T3P®                                              | Propylphosphonic anhydride                                   | 68957-94-8               | 5   | 5               | 5.3       | Regulated chemical. Usage of commercial solution in ethyl acetate preferred instead of DMF solution.                                                     |
| Al(Ot-Bu) <sub>3</sub>                            | Aluminium <i>tert</i> -butoxide                              | 556-91-2                 | 5   | 5               | 5.3       | MPV catalyst, ketone coreagent.                                                                                                                          |
| DMSO, DCC                                         | Dimethyl sulfoxide, N,N'-Dicyclohexylcarbodiimide            | 67-68-5<br>538-75-0      | 7   | 4               | 5.1       |                                                                                                                                                          |
| Zr(Ot-Bu) <sub>4</sub>                            | Zirconium <i>tert</i> -butoxide                              | 2081-12-1                | 5   | 5               | 5.1       | MPV catalyst, ketone coreagent.                                                                                                                          |
| Oxone®                                            | Potassium monoperoxysulfate                                  | 37222-66-5               | 5   | 4               | 4.7       | Oxone is highly exothermic & less stable above pH 7. May be unstable in the presence of water above 70 °C.                                               |
| Oxalyl chloride, DMSO                             | Oxalyl chloride, Dimethyl sulfoxide                          | 79-37-8<br>67-68-5       | 5   | 4               | 4.5       | Lachrymator, gaseous byproducts, DMS stench. Low temperature (-75 °C) necessary.                                                                         |
| Air, Cu catalyst                                  | Air, Copper catalyst                                         | 7758-89-6                | 3   | 8               | 4.5       | Very toxic to aquatic organisms, may cause long-term adverse effects in the aquatic environment. Solvent selection should account for oxygen atmosphere. |
| H <sub>2</sub> O <sub>2</sub> (>30%)              | Hydrogen peroxide (>30%)                                     | 7722-84-1                | 5   | 3               | 4.1       | Explosive risk.                                                                                                                                          |
| TPAP, NMO                                         | Tetrapropylammonium perruthenate, N-Methylmorpholine-N-Oxide | 114615-82-6<br>7529-22-8 | 3   | 5               | 3.8       | NMO generates toxic by-product.                                                                                                                          |
| KMnO <sub>4</sub>                                 | Potassium permanganate                                       | 7722-64-7                | 2   | 6               | 3.6       | Very toxic to aquatic organisms, may cause long-term adverse effects in the aquatic environment.                                                         |
| Cl <sub>2</sub> , Pyridine                        | Chlorine, Pyridine                                           | 7782-50-5                | 4   | 3               | 3.4       | Highly flammable. Very toxic to aquatic organisms.                                                                                                       |
| IBX                                               | 2-Iodoxybenzoic acid                                         | 61717-82-6               | 3   | 4               | 3.3       | Severe explosive risk.                                                                                                                                   |
| NiO                                               | Nickel (II) oxide                                            | 1313-99-1                | 2   | 5               | 2.9       | Damaging to lungs, may cause cancer.                                                                                                                     |
| PCC                                               | Pyridinium chlorochromate                                    | 26299-14-9               | 1   | 6               | 2.9       | May cause cancer.                                                                                                                                        |
| Dess-Martin periodinane                           | (1,1,1-Tris(acetoxy)-1,1-dihydro-1,2-benziodoxol-3-(1H)-one  | 87413-09-0               | 1   | 4               | 2.5       | Explosive risk.                                                                                                                                          |
| PDC                                               | Pyridinium dichromate                                        | 20039-37-6               | 1   | 4               | 2.5       | May cause cancer. Very toxic to aquatic organisms.                                                                                                       |

Figure S13: GSK Oxidation to Aldehydes and Ketones Green Reagent Guide. a) Front of guide with overview, b) Reverse of guide with more detail.

a)

### GSK Reagent Selection Guide – Reductive Amination

| Few Issues                                 | Some Issues                            | Major Issues                   |
|--------------------------------------------|----------------------------------------|--------------------------------|
| Enzyme                                     |                                        | PEMB, AcOH                     |
| H <sub>2</sub> , Pd/C                      | PMHS, Ti(Oi-Pr) <sub>4</sub>           | Borane-Pyridine                |
| H <sub>2</sub> , Pt/C                      |                                        | Trichlorosilane, Sigamide      |
| Formic acid                                | NaBH(OAc) <sub>3</sub> , AcOH          | Decaborane                     |
| 2-Picoline borane, AcOH                    |                                        | Hantzsch ethyl ester, Thiourea |
| NaBH <sub>4</sub>                          | Et <sub>3</sub> SiH, InCl <sub>3</sub> | Formic acid, Formaldehyde      |
| Hantzsch ethyl ester, Sc(OTf) <sub>3</sub> |                                        | NaBH <sub>3</sub> CN, AcOH     |

This guide should only be used by the expert trained chemist. Before using any reagent listed on this guide, a complete risk assessment must be carried out.

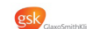

| b) | Material                                   | Full name                                                                                    | CAS number                | EHS | Clean chemistry | Greenness | Comments                                                                                                                                                                                       |
|----|--------------------------------------------|----------------------------------------------------------------------------------------------|---------------------------|-----|-----------------|-----------|------------------------------------------------------------------------------------------------------------------------------------------------------------------------------------------------|
|    | Enzyme                                     | Enzyme                                                                                       | N/A                       | 10  | 8               | 9.0       |                                                                                                                                                                                                |
|    | H <sub>2</sub> , Pd/C                      | Hydrogen, Palladium on Carbon                                                                | 1333-74-0<br>7440-05-3    | 7   | 7               | 7.2       | Flammable. Relative cost cheap. Catalyst can be recycled.                                                                                                                                      |
|    | H <sub>2</sub> , Pt/C                      | Hydrogen, Platinum on Carbon                                                                 | 1333-74-0<br>7440-6-4     | 7   | 7               | 7.2       | Flammable. Relative cost expensive. Catalyst can be recycled.                                                                                                                                  |
|    | Formic acid                                | Formic acid                                                                                  | 64-18-6                   | 7   | 7               | 6.9       | Causes severe burns.                                                                                                                                                                           |
|    | 2-Picoline borane, AcOH                    | 2-Picoline borane complex Acetic acid                                                        | 3999-38-0<br>64-19-7      | 5   | 8               | 6.6       | Broad scope claimed in literature.                                                                                                                                                             |
|    | NaBH <sub>4</sub>                          | Sodium borohydride                                                                           | 16940-66-2                | 5   | 8               | 6.4       |                                                                                                                                                                                                |
|    | Hantzsch ethyl ester, Sc(OTf) <sub>3</sub> | Diethyl 1,4-dihydro-2,6-dimethyl-3,5-pyridinedicarboxylate, Scandium triflate                | 1149-23-1<br>144026-79-9  | 7   | 5               | 6.1       | Preferred over Hantzsch ethyl ester/thiourea conditions                                                                                                                                        |
|    | PMHS, Ti(Oi-Pr) <sub>4</sub>               | Poly(methylhydrosiloxane), Titanium(IV) isopropoxide                                         | 9004-73-3<br>546-68-9     | 8   | 4               | 5.8       | Scope depends on catalyst used for imine formation.                                                                                                                                            |
|    | NaBH(OAc) <sub>3</sub> , AcOH              | Sodium triacetoxyborohydride, Acetic acid                                                    | 56553-60-7<br>64-19-7     | 5   | 6               | 5.8       | Many examples. Granular NaBH(OAc) <sub>3</sub> preferred on scale.                                                                                                                             |
|    | Et <sub>3</sub> SiH, InCl <sub>3</sub>     | Triethylsilane, Indium chloride                                                              | 617-86-7<br>10025-82-8    | 5   | 7               | 5.7       | Broad scope claimed in literature, mild conditions.                                                                                                                                            |
|    | PEMB, AcOH                                 | 5-Ethyl-2-methylpyridineborane, Acetic acid                                                  | 1014979-56-6<br>64-19-7   | 3   | 8               | 4.8       | Very toxic by inhalation and in contact with skin. Pic-BH <sub>3</sub> should be considered instead.                                                                                           |
|    | Borane-Pyridine                            | Borane-Pyridine                                                                              | 110-51-0                  | 3   | 9               | 4.7       | Contact with water liberates extremely flammable gases. Very toxic by inhalation. Pic-BH <sub>3</sub> should be considered instead.                                                            |
|    | Trichlorosilane, Sigamide                  | Trichlorosilane, S-N-(3,5-Di-tert-butylphenyl)-3-methyl-2-(N-formyl-N-methylamino)butanamide | 10025-78-2<br>928789-96-2 | 3   | 7               | 4.1       | Reacts violently with water. Spontaneously flammable in air. Contact with water liberates toxic gas.                                                                                           |
|    | Decaborane                                 | Decaborane                                                                                   | 17702-41-9                | 2   | 9               | 3.9       | Heating may cause an explosion. Very toxic by inhalation.                                                                                                                                      |
|    | Hantzsch ethyl ester, Thiourea             | Diethyl 1,4-dihydro-2,6-dimethyl-3,5-pyridinedicarboxylate, Thiourea                         | 1149-23-1<br>62-56-6      | 3   | 5               | 3.5       | Thiourea has limited evidence of a carcinogenic effect, is toxic to aquatic organisms, and risks harm to the unborn child. Use of Hantzsch ethyl ester with Sc(OTf) <sub>3</sub> is preferred. |
|    | Formic acid, Formaldehyde                  | Formic acid, Formaldehyde                                                                    | 64-18-6<br>50-00-0        | 2   | 5               | 3.3       | May cause cancer. Potential skin sensitizer. Danger of serious irreversible effects.                                                                                                           |
|    | NaBH <sub>3</sub> CN, AcOH                 | Sodium cyanoborohydride, Acetic acid                                                         | 25895-60-7<br>64-19-7     | 1   | 8               | 2.7       | Explosive when mixed with oxidizing substances. Very toxic. Contact with acid liberates very toxic gas.                                                                                        |

Figure S14: GSK Reductive Amination Green Reagent Guide. a) Front of guide with overview, b) Reverse of guide with more detail.



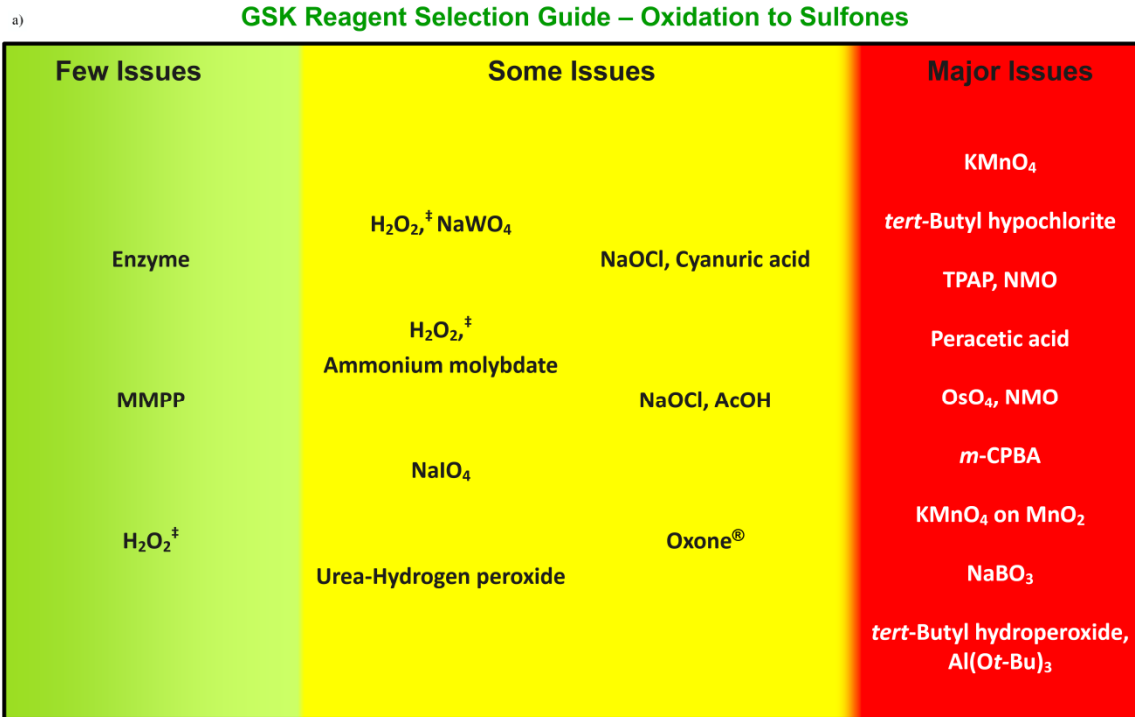

† Use of ≤30%  $\text{H}_2\text{O}_2$  is required for these procedures to not fall into the "Major Issues" category.

This guide should only be used by the expert trained chemist. Before using any reagent listed on this guide, a complete risk assessment must be carried out.

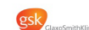

| b) | Material                                                         | Full name                                                                    | CAS number                 | EHS | Clean chemistry | Greenness | Comments                                                                                                     |
|----|------------------------------------------------------------------|------------------------------------------------------------------------------|----------------------------|-----|-----------------|-----------|--------------------------------------------------------------------------------------------------------------|
|    | Enzyme                                                           | Enzyme                                                                       | N/A                        | 10  | 9               | 9.6       |                                                                                                              |
|    | MMPP                                                             | Magnesium monoperoxyphthalate hexahydrate                                    | 84665-66-7                 | 10  | 5               | 6.8       |                                                                                                              |
|    | $\text{H}_2\text{O}_2$                                           | Hydrogen peroxide (≤30 wt%)                                                  | 7722-84-1                  | 7   | 6               | 6.7       |                                                                                                              |
|    | $\text{H}_2\text{O}_2, \text{NaWO}_4$                            | Hydrogen peroxide (≤30 wt%), Sodium tungstate                                | 7722-84-1<br>10213-10-2    | 7   | 5               | 6.1       | Potential explosion hazard from mixture of hydrogen peroxide with transition metal salt.                     |
|    | $\text{H}_2\text{O}_2$ , Ammonium molybdate                      | Hydrogen peroxide (≤30 wt%), Ammonium molybdate tetrahydrate                 | 7722-84-1<br>12027-67-7    | 7   | 5               | 6.0       | Potential explosion hazard from mixture of hydrogen peroxide with transition metal salt.                     |
|    | $\text{NaIO}_4$                                                  | Sodium periodate                                                             | 7790-28-5                  | 7   | 5               | 5.5       |                                                                                                              |
|    | Urea-Hydrogen peroxide                                           | Urea-Hydrogen peroxide                                                       | 124-43-6                   | 5   | 5               | 5.3       |                                                                                                              |
|    | NaOCl, Cyanuric acid                                             | Sodium hypochlorite, Cyanuric acid                                           | 7681-52-9<br>108-80-5      | 4   | 7               | 5.2       |                                                                                                              |
|    | NaOCl, AcOH                                                      | Sodium hypochlorite, Acetic acid                                             | 7681-52-9<br>64-19-7       | 4   | 6               | 4.9       |                                                                                                              |
|    | Oxone®                                                           | Potassium monoperoxydisulfate                                                | 37222-66-5                 | 5   | 4               | 4.8       | Oxone is highly exothermic and less stable above pH 7. May be unstable in the presence of water above 70 °C. |
|    | $\text{KMnO}_4$                                                  | Potassium permanganate                                                       | 7722-64-7                  | 2   | 7               | 3.9       | Very toxic to aquatic organisms, may cause long-term adverse effects in the aquatic environment.             |
|    | <i>tert</i> -Butyl hypochlorite                                  | <i>tert</i> -Butyl hypochlorite                                              | 507-40-4                   | 3   | 6               | 3.9       | Heating may cause explosion. Causes burns. Spontaneously flammable.                                          |
|    | TPAP, NMO                                                        | Tetrapropylammonium perruthenate, <i>N</i> -Methylmorpholine <i>N</i> -oxide | 114615-82-6<br>7529-22-8   | 3   | 5               | 3.9       | Heating may cause explosion.                                                                                 |
|    | Peracetic acid                                                   | Peracetic acid                                                               | 79-21-0                    | 2   | 7               | 3.8       | Causes severe burns. May cause fire.                                                                         |
|    | $\text{OsO}_4$ , NMO                                             | Osmium tetroxide<br><i>N</i> -Methylmorpholine <i>N</i> -oxide               | 20816-12-0<br>7529-22-8    | 3   | 4               | 3.7       | $\text{OsO}_4$ vapors are highly toxic (high vapor pressure).                                                |
|    | <i>m</i> -CPBA                                                   | <i>meta</i> -Chloroperoxybenzoic acid                                        | 937-14-4                   | 3   | 5               | 3.6       | Heating may cause explosion.                                                                                 |
|    | $\text{KMnO}_4$ on $\text{MnO}_2$                                | Manganese dioxide supported Potassium permanganate                           | 1313-13-9<br>7722-64-7     | 2   | 5               | 3.3       | Very toxic to aquatic organisms, may cause long-term adverse effects in the aquatic environment.             |
|    | $\text{NaBO}_3$                                                  | Sodium perborate                                                             | 10486-00-7 or<br>7632-04-4 | 1   | 7               | 3.2       | May cause fire. May cause infertility.                                                                       |
|    | <i>tert</i> -Butyl hydroperoxide,<br>$\text{Al}(\text{Ot-Bu})_3$ | <i>tert</i> -Butyl hydroperoxide<br>Aluminum <i>tert</i> -butoxide           | 75-91-2<br>556-91-2        | 1   | 6               | 2.5       | Sensitive to shocks, sparks. May react violently with reducing agents.                                       |

**Figure S15: GSK Oxidation to Sulfones Green Reagent Guide. a) Front of guide with overview, b) Reverse of guide with more detail.**
